1 **Vulnerability of ARID1A deficient cancer cells to pyrimidine synthesis blockade**

2 Zhigui Li<sup>1,4</sup>, Shijun Mi<sup>2,4</sup>, Oloruntoba I. Osagie<sup>1</sup>, Jing Ji<sup>1</sup>, Chia-Ping H. Yang<sup>2</sup>, Melissa

3 Schwartz<sup>2</sup>, Pei Hui<sup>3</sup> and Gloria S. Huang<sup>1</sup>\*

4 **Affiliations**

5 <sup>1</sup>Department of Obstetrics, Gynecology & Reproductive Sciences, Yale University, Yale  
6 School of Medicine, Yale Cancer Center, New Haven, Connecticut, 06520, USA.

7 <sup>2</sup>Department of Molecular Pharmacology, and Department of Obstetrics, Gynecology &  
8 Women's Health, Albert Einstein College of Medicine, Albert Einstein Cancer Center,

9 Bronx, New York, 10461, USA. <sup>3</sup>Department of Pathology, Yale University, Yale School  
10 of Medicine, Yale Cancer Center, New Haven, Connecticut, 06520, USA. <sup>4</sup>These

11 authors contributed equally: Zhigui Li and Shijun Mi. \*Correspondence and requests for  
12 materials should be addressed to G.S.H. ([gloria.huang@yale.edu](mailto:gloria.huang@yale.edu)).

13 **Running title:** Targeting pyrimidine synthesis in ARID1A mutated cancer

14 **Key words:** Ovarian cancer; Pyrimidine synthesis; ARID1A

15 **Disclosure of Potential Conflicts of Interest**

16 G.S. Huang has received consulting fees/speaking honoraria from Bristol-Myers Squibb,  
17 Tesaro, and AstraZeneca Inc; these activities are unrelated to the work described in this  
18 manuscript. G.S. Huang is the inventor on a provisional patent filed by Yale University,  
19 related to the work described in this manuscript. No potential conflicts of interest were  
20 disclosed by the other authors.

21

22

23 **ABSTRACT**

24 Here we report the discovery and preclinical validation of a novel precision medicine  
25 strategy for *ARID1A*-mutated cancer. Unbiased proteomics reveals for the first time that  
26 *ARID1A* protein (BAF250a) binds aspartate transcarbamoylase (ATCase), a key  
27 regulatory enzyme of the *de novo* pyrimidine synthesis pathway. Using isogenic paired  
28 *ARID1A* proficient/deficient cancer cell lines, we show that *ARID1A* protein deficiency  
29 (as occurs in *ARID1A* mutant cancers) leads to metabolic reprogramming and  
30 pyrimidine synthesis dependency. Pyrimidine synthesis blockade using the FDA-  
31 approved drug teriflunomide (a DHODH inhibitor) suppresses tumor growth and  
32 selectively induces DNA damage in *ARID1A*-deficient tumor models. Combining  
33 pyrimidine synthesis inhibition with DNA damage repair blockade, using teriflunomide  
34 and AZD6738 (an ATR inhibitor), achieves potent synergy and induces sustained tumor  
35 regression in *ARID1A*-mutant ovarian cancer patient-derived xenografts (PDX). These  
36 compelling preclinical data support the evaluation of this novel combination treatment in  
37 patients with *ARID1A*-mutated cancers.

38 **SIGNIFICANCE:** We identified that *ARID1A*-deficient cells are selectively vulnerable to  
39 pyrimidine synthesis blockade. Preclinical studies demonstrate the *in vivo* efficacy of a  
40 synergistic drug combination that concurrently inhibits the *de novo* pyrimidine synthesis  
41 pathway and DNA damage repair to induce regression in patient-derived xenograft  
42 models of *ARID1A*-mutated cancer.

43

44

45

## 46 INTRODUCTION

47 *ARID1A* is among the most commonly mutated tumor suppressor genes in human  
48 cancer. The highest frequency of *ARID1A* mutations occur in gynecologic malignancies,  
49 including clear cell ovarian carcinoma (46-57%), endometrioid ovarian carcinoma  
50 (30%), uterine endometrial carcinoma (34%) and uterine carcinosarcoma (20-36%)<sup>1-3</sup>.  
51 *ARID1A* mutations are also observed in ~10-20% of diverse cancer types including  
52 gastric carcinoma, cholangiocarcinoma, bladder urothelial carcinoma, hepatocellular  
53 carcinoma, esophageal adenocarcinoma, cutaneous melanoma, and colorectal  
54 carcinoma. Mutations in *ARID1A* are strongly correlated with loss of protein  
55 expression<sup>1,4</sup>. The protein encoded by *ARID1A* is a core subunit of the BAF  
56 (mammalian SWI/SNF) chromatin remodeling complex, which modulates gene  
57 expression by binding to AT-rich DNA regions, mobilizing nucleosomes, and interacting  
58 with transcription factors, coactivators, and corepressors<sup>5</sup>. Among BAF complex  
59 subunits, *ARID1A* is the most frequently mutated in human cancer.

60 Patients with *ARID1A* mutated cancers have worse clinical outcomes compared to  
61 patients with *ARID1A* wildtype cancers. Overall survival is significantly shorter in  
62 patients with *ARID1A* mutated cancers compared to *ARID1A* wildtype cancers, when  
63 analyzing a pan-cancer cohort and when analyzing cancer-specific cohorts of patients  
64 with ovarian, hepatocellular, or pancreatic cancer<sup>6</sup>. Loss of *ARID1A* is also linked to  
65 shorter progression-free survival and chemoresistance<sup>7</sup>. The high frequency of *ARID1A*  
66 mutations in human cancer, and the unmet need for effective treatment for *ARID1A*  
67 deficient cancers, led us to undertake this study to uncover novel *ARID1A* functions  
68 associated with targetable therapeutic vulnerabilities.

69 In this study, we used an unbiased proteomics approach to identify novel protein-  
70 protein interactions of ARID1A. We show that ARID1A directly binds to ATCase, one of  
71 three key regulatory enzymes of the *de novo* pyrimidine synthesis pathway encoded by  
72 the *CAD* gene (Carbamoyl-Phosphate Synthetase 2, Aspartate Transcarbamylase, And  
73 Dihydroorotase). ARID1A protein deficiency (as occurs in *ARID1A*-mutated cancers)  
74 leads to metabolic reprogramming characterized by an increased rate of *de novo*  
75 pyrimidine synthesis and selective vulnerability to pyrimidine synthesis blockade, thus  
76 identifying an Achilles' heel that can be therapeutically exploited. Furthermore,  
77 combination treatment with pyrimidine synthesis blockade and ataxia telangiectasia and  
78 rad3-related (ATR) kinase inhibition is potently synergistic and induces tumor  
79 regressions *in vivo*. Our results show a novel targetable function of ARID1A as a  
80 regulator of *de novo* pyrimidine synthesis and provide a therapeutic strategy to exploit  
81 the dependency of ARID1A deficient tumors on this metabolic pathway.

82

## 83 **RESULTS**

84 **ARID1A interacts with the ATCase domain of CAD.** To investigate unknown  
85 functions of ARID1A, we used mass spectrometry to analyze the immunoaffinity-purified  
86 ARID1A complex with the aim to identify novel ARID1A-interacting proteins. First, the  
87 endogenous ARID1A complex was immunoprecipitated from *ARID1A* wildtype  
88 endometrial cancer cells (KLE)<sup>8</sup>. The resulting Coomassie stained SDS-PAGE gel is  
89 shown in Fig. 1a. In addition to known BAF complex proteins, a ~250 kD protein band  
90 was observed and excised for analysis. Following trypsin proteolysis, the peptide  
91 sequences were determined by liquid chromatography-tandem mass spectrometry (LC-

92 MS/MS) and identified to be Carbamoyl-phosphate synthetase 2, Aspartate  
93 transcarbamoylase, and Dihydroorotase (CAD). Fragmentation spectra of CAD peptides  
94 is shown in Supplementary Fig. S1a. We also performed LC-MS/MS analysis of the  
95 immunopurified ARID1A complex from *ARID1A* wildtype ovarian cancer cells (ES2)<sup>9</sup>  
96 and obtained similar results identifying CAD peptides. Based on functional similarities  
97 analysis (Supplementary Fig. S1b), CAD differs from known members of the ARID1A  
98 interactome (i.e. BAF complex proteins) and thus is newly identified to be an ARID1A-  
99 interacting protein.

100 Immunoprecipitation using anti-ARID1A (Fig. 1b) and anti-CAD (Fig. 1c) antibodies  
101 followed by immunoblotting confirms the interaction between endogenous ARID1A and  
102 CAD in cell lines that express wild-type *ARID1A*. Co-immunoprecipitation results from  
103 *ARID1A*-wildtype ovarian cancer (ES2)<sup>8</sup> cells are shown in Fig. 1. Similar results are  
104 observed in *ARID1A*-wildtype endometrial cancer cells (KLE), data not shown. In  
105 addition to ARID1A, a core BAF complex subunit is SMARCA4 (also known as BRG1)<sup>10</sup>.  
106 As expected, SMARCA4 co-immunoprecipitates with ARID1A (Fig. 1b). In contrast,  
107 SMARCA4 does not co-immunoprecipitate with CAD, nor does CAD co-  
108 immunoprecipitate with SMARCA4 (Fig. 1c, 1d). ARID1A's interaction with CAD  
109 appears to be distinct from its known role as a BAF complex member.

110 The nature of the protein-protein interaction of CAD and ARID1A was further  
111 investigated. Recombinant GST-tagged full-length CAD and CAD protein fragments,  
112 corresponding to the protein domains shown in Fig.1e, were expressed in *Escherichia*  
113 *coli*. The *in vitro* interaction of full-length CAD with ARID1A was demonstrated by GST  
114 pulldown assay (Fig. 1f). By using recombinant GST-tagged CAD fragments as bait, the

115 ARID1A-interacting domain of CAD is localized to the aspartate transcarbamylase  
116 (ATCase) domain (Fig. 1f). In the next set of experiments, GST-ATCase was used as  
117 the bait, and full-length ARID1A, N-terminus ARID1A, or C-terminus ARID1A was  
118 expressed in HEK293 (Fig. 1g). GST-ATCase pulls down full-length ARID1A, as  
119 expected, and C-terminus ARID1A but not N-terminus ARID1A (Fig. 1h). Thus, ATCase  
120 is the ARID1A-interacting domain of CAD, and the C-terminus of ARID1A binds to  
121 ATCase.

122 **ARID1A is a negative regulator of *de novo* pyrimidine biosynthesis.** Next, we  
123 investigated the role of ARID1A as a potential regulator of CAD via its protein-protein  
124 interaction. *ARID1A* mutations in human cancers are typically associated with loss of  
125 ARID1A (BAF250A) protein expression due to truncating nonsense or frameshift  
126 mutations. To interrogate the functional consequences of ARID1A mutation and protein  
127 deficiency, we used previously validated short hairpin (sh) RNA vectors<sup>11</sup> to knockdown  
128 *ARID1A*, and expanded stably transfected clones, called shARID1A(a) and  
129 shARID1A(b), for further analysis. Knockdown of *ARID1A* was confirmed by  
130 immunoblotting (Fig. 2a and 2b). The resulting phenotype was evaluated relative to  
131 isogenic cells transfected with a non-targeting scrambled control shRNA (shCon) and  
132 untransfected cells.

133 As shown in Fig. 2a and 2b, *ARID1A* knockdown cells demonstrate higher total CAD  
134 levels relative to control cells. CAD activity is controlled via phosphorylation at key  
135 regulatory sites including serine 1859. This CAD site is phosphorylated by ribosomal  
136 protein S6 kinase B1 (RPS6KB1, also known as S6K)<sup>12,13</sup>. Shown in Fig. 2a and 2b,  
137 serine 1859 phosphorylated CAD protein (P-CAD Ser1859) levels increase following

138 *ARID1A* knockdown. In *ARID1A* knockdown cells, RPS6KB1 activity is similar as in  
139 control cells; evaluation of the RPS6KB1 canonical substrate, ribosomal protein S6 by  
140 immunoblotting is shown in Supplementary Fig. S2. Thus, total and phosphorylated  
141 CAD levels following *ARID1A* knockdown is not associated with altered RPS6KB1  
142 activity and is inversely correlated with the ARID1A protein level.

143 The inverse correlation of ARID1A levels with CAD levels was confirmed by  
144 immunofluorescence analysis in several independent isogenic paired cell lines, and  
145 representative data is shown in Fig. 2c. Following *ARID1A* knockdown, the protein  
146 expression of phosphorylated CAD level is increase compared with control cells.

147 Complementing these experiments, the effect of ARID1A restoration on CAD was  
148 determined using *ARID1A*-mutant ovarian cancer cell lines, SKOV3 and OVI5E  
149 (Supplementary Table S10). Both of these cell lines contain *ARID1A* mutations,  
150 associated with loss of ARID1A protein expression. To restore *ARID1A* expression,  
151 SKOV3 cells and OVI5E cells were stably transfected with a tetracycline inducible  
152 system to express full-length wildtype *ARID1A* and compared with empty vector control.  
153 Restored ARID1A protein expression was confirmed by immunoblotting (Fig. 2d). The  
154 total and phosphorylated CAD protein levels decrease in *ARID1A* restoration cells (Fig.  
155 2e and 2f). The inverse correlation of ARID1A and phosphorylated CAD levels in the  
156 *ARID1A* restoration cell lines is also evident by immunofluorescence (Fig. 2g).

157 Similarly, ARID1A restoration was done in HEC-1-A, an *ARID1A*-mutant endometrial  
158 cancer cell line. This cell line has two heterozygous truncating mutations at p.Q1835\*  
159 and p.Q2115\* associated with loss of ARID1A protein expression<sup>14</sup>. Following

160 transfection with full-length ARID1A, compared with control empty vector, total and  
161 phosphorylated CAD levels decrease (Supplementary Fig. S3).

162 Collectively, these findings indicate that wildtype ARID1A functions as a negative  
163 regulator of CAD, wherein ARID1A deficiency results in an increase in total and  
164 phosphorylated CAD.

165 **ARID1A deficiency promotes *de novo* pyrimidine biosynthesis.** The ATCase  
166 enzymatic activity of CAD catalyzes the reaction of carbamoyl phosphate and aspartate  
167 to N-carbamoyl aspartate, and is the first committed step in *de novo* pyrimidine  
168 biosynthesis<sup>15</sup> (Fig. 3a). We next investigated whether ARID1A deficiency affects *de*  
169 *novo* pyrimidine synthesis. To quantify the rate of *de novo* pyrimidine synthesis,  
170 incorporation of <sup>14</sup>C-radiolabelled aspartate into RNA and DNA was measured. RNA  
171 and DNA synthesized via the pyrimidine salvage pathway do not incorporate the <sup>14</sup>C-  
172 radiolabelled aspartate, imparting specificity for measuring *de novo* pyrimidine synthesis  
173 flux. We found that *ARID1A* knockdown results in increased <sup>14</sup>C incorporation into RNA,  
174 indicating increased flux through the *de novo* pyrimidine synthesis pathway (Fig. 3b).  
175 Increased <sup>14</sup>C incorporation is similarly observed in DNA (data not shown). This  
176 demonstrates the inverse relationship of ARID1A levels and the rate of *de novo*  
177 pyrimidine synthesis.

178 An elevated rate of *de novo* pyrimidine biosynthesis may result in higher steady  
179 state levels of its product Uridine-5'-triphosphate (UTP). Thus, we examined UTP levels  
180 in *ARID1A* knockdown and restoration cell line panels. The UTP level is increased in  
181 *ARID1A* knockdown cells compared with control *ARID1A* wildtype cells (Fig. 3c and  
182 Supplementary Fig. S4a). The UTP level is reduced in *ARID1A* restoration cells



183 compared with control *ARID1A*-mutant cells, SKOV3 and OVI5E (Fig. 3d). Together,  
184 these data indicate that the interaction of *ARID1A* and ATCase regulates *de novo*  
185 pyrimidine biosynthesis flux and consequently, the pyrimidine nucleotide pool.

186 ***ARID1A*-deficient cells and tumors display sensitization to *de novo* pyrimidine**  
187 **synthesis blockade therapy.** We evaluated the effect of FDA-approved inhibitors of  
188 dihydroorotate dehydrogenase (DHODH), the enzyme immediately downstream of CAD  
189 that catalyzes the conversion of dihydroorotate to orotate. As shown in Fig. 4a, *ARID1A*  
190 knockdown cells are significantly more sensitive to the DHODH inhibitor teriflunomide.  
191 Similar results are observed with the DHODH inhibitor leflunomide (data not shown).  
192 *ARID1A*-mutant ovarian cancer cell lines SKOV3 and OVI5E are sensitive to  
193 teriflunomide, while *ARID1A* restoration decreases sensitivity (Fig. 4b and 4c).

194 Vulnerability of *ARID1A* deficient cells to *de novo* pyrimidine synthesis blockade was  
195 confirmed using isogenic *ARID1A* knockout and *ARID1A* wildtype HCT116 colorectal  
196 carcinoma cells. Homozygous deletion of *ARID1A* results from knock-in of premature  
197 stop codons (Q456\*/Q456\*). Compared to wildtype *ARID1A* cells, *ARID1A* knockout  
198 cells are hypersensitive to DHODH inhibitors (Supplementary Fig. S5).

199 *In vivo* validation is an important step in translation of scientific findings to clinical  
200 application. Therefore, we evaluated the therapeutic efficacy of DHODH inhibition using  
201 clear cell ovarian cancer xenografts (Fig. 4d). Xenograft-bearing mice were randomized  
202 to treatment with the DHODH inhibitor teriflunomide, or vehicle alone. Teriflunomide  
203 was administered intraperitoneally at a well-tolerated dosing regimen of 4 mg/kg every  
204 other day, corresponding to a human equivalent dose of 0.32 mg/kg every other day.  
205 This dose level is ~30% lower than the FDA-approved dose level of 14 mg daily used

206 for treating multiple sclerosis<sup>16</sup>. As shown in Fig. 4d and 4e, teriflunomide selectively  
207 suppresses tumor growth in *ARID1A*-deficient xenografts, compared to *ARID1A*-  
208 wildtype xenografts (Supplementary Fig. S6). We also evaluated the effect of  
209 teriflunomide in *ARID1A*-mutant SKOV3 tumor xenograft models (Fig. 4h).  
210 Teriflunomide significantly improves animal survival compared to the vehicle treatment  
211 group.

212 Patient-derived xenograft (PDX) models are particularly valuable for preclinical  
213 validation. We used an *ARID1A*-mutant clear cell ovarian cancer PDX model (CTG-  
214 2213; *ARID1A* truncating mutation at Gln211\*) developed from direct implantation of  
215 fresh viable human tumor tissue propagated in suitable mouse hosts. PDX models  
216 accurately recapitulate tumor heterogeneity and predict clinical response to therapy.  
217 Shown in Fig. 4i, tumor volume is significantly reduced in the teriflunomide treatment  
218 group relative to the vehicle control group ( $P < 0.001$ ). There was no weight loss or  
219 toxicity observed in mice in either the treatment or vehicle control groups  
220 (Supplementary Fig. S7). These data demonstrate the selective *in vivo* efficacy of  
221 DHODH inhibition in multiple *ARID1A*-deficient cancer models.

#### 222 **DHODH inhibitor therapy induces DNA damage repair.**

223 To investigate *ARID1A*-dependent differences in the cellular response to DHODH  
224 inhibition, we evaluated DNA damage following drug treatment of isogenic *ARID1A*-  
225 proficient and deficient cells. As shown by gamma-H2AX immunofluorescence and  
226 immunoblotting (Fig. 5i-k), teriflunomide selectively induces DNA damage in *ARID1A*-  
227 deficient cells relative to *ARID1A*-proficient ES2 cells. Teriflunomide treatment activates  
228 the CHK1 DNA repair pathway, as shown by a robust increase in Ser-345

229 phosphorylation of CHK1 in ES2-shARID1A cells compared with the ES2-shCon cells  
230 (Fig. 5i-j). These results indicate that the cellular response of DHODH inhibition  
231 depends on the ARID1A status. In *ARID1A*-deficient cells, induction of DNA damage by  
232 teriflunomide triggers DNA damage repair signaling pathways that involve CHK1 kinase  
233 activation.

### 234 **ATR inhibition synergistically potentiates therapeutic effect of DHODH blockade**

235 Since CHK1 kinase activation requires ATR activity, we hypothesized that ATR  
236 inhibition would prevent activation of protective DNA repair signaling and thereby  
237 enhance the efficacy of DHODH blockade.

238 *ARID1A*-deficient cells may rely on ATR-mediated DNA damage repair due to  
239 reduced activity of alternate DNA repair pathways<sup>17</sup>. We confirmed enhanced sensitivity  
240 to ATR inhibition in *ARID1A*-knockout HCT116 colorectal carcinoma cells compared to  
241 *ARID1A*-wildtype HCT116 cells (Supplementary Fig. S9). We also evaluated the ATR  
242 inhibitor response in *ARID1A*-knockout ES2 ovarian carcinoma cells compared to  
243 *ARID1A*-wildtype ES2. We report in a separate manuscript the *in vitro* and *in vivo*  
244 evaluation of ATR inhibitors (e.g. AZD-6738, VX-970) in multiple ovarian and  
245 endometrial models. Our results in isogenic models demonstrate that *ARID1A*  
246 deficiency confers sensitization to ATR inhibitors.

247 Next we evaluated the drug combination of teriflunomide with ATR inhibitors (AZD-  
248 6738, VX-970). Drug combination analysis by the method of Chou and Talalay<sup>18</sup>  
249 demonstrates synergy of concurrent teriflunomide and ATR inhibition in multiple  
250 independent cancer cell lines (Fig. 5e-f; Supplementary Table S2-4). As shown using  
251 knockdown and CRISPR knockout experiments, *ARID1A*-deficient cells are significantly

252 more sensitive to combination therapy compared to isogenic *ARID1A*-proficient cells  
253 (Fig. 5a-b; Supplementary Table S1, S5, S8; Supplementary Fig S10). *ARID1A*  
254 restoration in *ARID1A* mutant cells results in drug antagonism and diminishes the  
255 response to combination treatment (Fig. 5c-d, 5g-h; and Supplementary Table S6 and  
256 S7). As predicted, combination treatment results in potent induction of DNA damage in  
257 *ARID1A*-deficient cells compared to proficient cells (Fig. 5i-5k).

258 *In vivo* evaluation of Teriflunomide combined with ATR inhibitor AZD-6738 shows that  
259 the combination treatment is highly efficacious (Fig. 5l-m and Supplementary Fig. S11).  
260 Evaluated in two independent experiments using an aggressive ovarian cancer  
261 xenograft model (ES2-sh*ARID1A*) and an *ARID1A*-mutant clear cell ovarian cancer  
262 PDX model, the combination treatment is significantly more effective than single drug  
263 treatments (Fig. 5l-m). The animals maintain normal activity and weight throughout drug  
264 treatments which appear to be well tolerated. Sustained tumor regression is observed  
265 following combination treatment in the *ARID1A*-mutant clear cell ovarian cancer PDXs  
266 (Fig. 5m). Together, these data provide compelling preclinical data to support the  
267 efficacy of this novel combination treatment for *ARID1A*-mutant cancer.

## 268 **DISCUSSION**

269 Our results reveal a novel therapeutically targetable function of *ARID1A* as a  
270 regulator of *de novo* pyrimidine synthesis. We show for the first time that *ARID1A*  
271 deficiency results in vulnerability to pyrimidine synthesis blockade.

272 We found that pyrimidine synthesis blockade using currently available FDA-approved  
273 drugs such as teriflunomide selectively suppresses cellular proliferation and induces  
274 DNA damage in *ARID1A*-deficient cells. *In vitro* and *in vivo* experiments demonstrate

275 that ARID1A deficiency predicts sensitivity to teriflunomide. Based on these data,  
276 monotherapy with DHODH inhibitors may be useful for targeted treatment of cancers  
277 with *ARID1A* mutations.

278 The antitumor efficacy of DHODH inhibition is enhanced by concurrently exploiting  
279 the dependency of *ARIDA*-mutated cancers on ATR-mediated DNA repair. We show  
280 that ATR inhibitors synergize with teriflunomide to potentiate DNA damage and  
281 suppress cellular proliferation. This novel drug combination induced sustained tumor  
282 regression in a highly aggressive tumor model, *ARID1A*-mutated ovarian clear cell  
283 carcinoma PDXs. Combining pyrimidine synthesis blockade with DNA damage repair  
284 inhibitors is an attractive strategy for clinical evaluation in biologically aggressive  
285 *ARID1A*-mutated cancers.

286 We carried out protein interaction studies that show ARID1A directly binds to ATCase  
287 (one of three enzymes encoded by the *CAD* gene). ATCase, the primary regulatory  
288 enzyme of *de novo* pyrimidine biosynthesis, is allosterically regulated by ATP availability  
289 thereby functioning as a cellular energy sensor input to this pathway. In addition to its  
290 enzymatic activity being positively regulated by a purine (ATP), ATCase is negatively  
291 regulated by a pyrimidine (CTP), enabling its critical function of maintaining nucleotide  
292 pool balance between purines and pyrimidines<sup>19,20</sup>. Nucleotide pool balance is a key  
293 determinant of DNA replication fidelity. Thus, regulation of ATCase by ARID1A could  
294 play a role in maintaining nucleotide pool balance and DNA replication fidelity, and may  
295 contribute to ARID1A's tumor suppressor function.

296 In summary, we discovered that ARID1A regulates the *de novo* pyrimidine synthesis  
297 pathway through an unexpected interaction with the energy-sensing enzyme ATCase.

298 Metabolic reprogramming that results from ARID1A deficiency confers hypersensitivity  
299 to pyrimidine synthesis blockade, leading to therapeutic opportunities to repurpose  
300 FDA-approved inhibitors such as teriflunomide. Based on compelling data from *in vitro*  
301 and *in vivo* studies, we propose clinical trials of pyrimidine synthesis inhibitors alone and  
302 in combination with ATR inhibitors for precision therapy of *ARID1A*-mutated cancers.

303

## 304 **METHODS**

### 305 **Reagents**

#### 306 *Plasmids*

307 HA-tagged full-length *ARID1A* was amplified by PCR from pCNA6-V5/His-ARID1A  
308 (provided by I.-M. Shih<sup>11</sup>) and subcloned into the pCIN4 expression vector<sup>21</sup>. To  
309 construct the expression plasmids for GST-CAD and GST-CAD fragments, cDNA  
310 sequences of full-length *CAD* and its fragments were amplified by PCR from pcDNA3.1-  
311 HisFlag-CAD (Addgene) and subcloned into the pGEX 4T-2 vector (GE Healthcare Life  
312 Sciences) for expression in BL21 bacteria. V5-tagged full-length BAF250a; V5-tagged  
313 BAF250a fragment, amino acids 1-1758; and V5-tagged BAF250a fragment, amino  
314 acids 1759-2285, were created by G. R. Crabtree<sup>10</sup> and obtained from Addgene. Short  
315 hairpin RNA (shRNA) lentiviral plasmids were kindly provided by I.-M. Shih<sup>8</sup>. The  
316 shRNA sequences for *ARID1A* are as follows: sh1(TRCN0000059090), target sequence  
317 CCTCTCTTATACACAGCAGAT, and sh2(TRCN0000059091), target sequence  
318 CCGTTGATGAACTCATTGGTT. The vector backbone is pLKO.1. V5/His-tagged  
319 pLenti-puro-LacZ and pLenti-puro-ARID1A were obtained from Addgene.

#### 320 *Antibodies and Drugs*

321 Antibodies for ARID1A, CAD, CAD (IHC), and  $\beta$ -actin were from Bethyl Laboratories.  
322 Antibodies for BRG1 (SMARCA4), Phospho-CAD (Serine 1859), Phospho-CHK1  
323 (Serine 345), phosphor-Histone H2AX ( $\gamma$ H2AX), HA, V5, RPS6, Phospho-RPS6, and  
324 GAPDH were from Cell Signaling Technology. Anti-IgG and HRP-labeled anti-rabbit  
325 secondary antibodies were from Invitrogen. Leflunomide was from Enzo Life Sciences.  
326 Teriflunomide and PF-4708671 were from Tocris. AZD6738 was from ChemScene.  
327 VX970 (VE-822) was from Selleck Chemicals.

### 328 *Cell Lines*

329 Adherent cell lines were cultured in RPMI 1640 (Gibco) supplemented with 10% fetal  
330 bovine serum (Gibco) and 1% penicillin-streptomycin (Gibco) at 37°C, 5% CO<sub>2</sub>. Low-  
331 passage-number cells were used, and all cell lines tested negative for mycoplasma  
332 using the MycoAlert Mycoplasma Detection Kit (Lonza). The following ovarian and  
333 endometrial cancer cell lines were used: ES2<sup>9</sup>, KLE<sup>8</sup>, SKOV3, OVISe (JCRB Cell  
334 Bank), and HEC-1-A<sup>8</sup> cells and their stably transfected subclones, as described below.  
335 Cell lines were authenticated using the GenePrint10 kit (Promega) and matching to their  
336 original profiles (ATCC). ARID1A protein expression status was confirmed by  
337 immunoblotting. HEK293FT cells were from Thermo Fisher Scientific. *ARID1A*-knockout  
338 HCT116 (homozygous truncating mutations, Q456\*/Q456\*) and *ARID1A*-wildtype  
339 HCT116 colorectal carcinoma cells were from Horizon Discovery.

### 340 **Mass Spectrometry Analysis of the Immunopurified ARID1A Complex**

341 The immunoprecipitated ARID1A protein complex was separated by gel  
342 electrophoresis, followed by peptide analysis of the digested gel bands by C18  
343 reversed-phase chromatography using an UltiMate 3000 RSLCnano System (Thermo

344 Scientific) equipped with an Acclaim PepMap C18 column (Thermo Scientific) and  
345 connected to a TriVersa NanoMate nanoelectrospray source (Advion) and a linear ion  
346 trap LTQ XL mass spectrometer (Thermo Scientific). Protein identification was  
347 performed using Mascot search engine v. 2.5.1 (Matrix Science) against the NCBI  
348 Homo sapiens database. Scaffold software v. 4.5.1 (Proteome Software) was used to  
349 validate the MS/MS peptide and protein identification based on 95% peptide and 99%  
350 protein probabilities, respectively.

### 351 **Functional similarities analysis**

352 Gene Ontology (GO) enrichment analysis by R packages was conducted as previously  
353 described<sup>22</sup>. Briefly, based on the semantic similarities of GO terms used for gene  
354 annotation, protein inside the interactome were ranked by the average functional  
355 similarities between the protein and its interaction partners. Functional similarity, which  
356 is defined as the geometric mean of their semantic similarities in molecular function  
357 (MF), cellular component (CC) and biological process (BP) aspect of GO, was designed  
358 for measuring the strength of the relationship between each protein and its partners by  
359 considering function and location of proteins. The distributions of functional similarities  
360 were demonstrated in supplementary Fig. S1. Proteins, which showed strong  
361 relationship in function and location among the proteins within the interactome, were  
362 essential for the interactome to exert their functions. The average of functional  
363 similarities was used to rank protein in the ARID1A interactome. A cutoff value of 0.5  
364 was chosen. The source code is available upon request.

### 365 **Immunoblot Analysis and Co-Immunoprecipitation Assay**



366 For immunoblotting experiments, cells were lysed in BC200 lysis buffer [20 mM Tris-HCl  
367 (pH 7.5), 200 mM NaCl, 1 mM EDTA, 0.2% Nonidet P-40 (NP-40), freshly added  
368 complete protease inhibitor cocktail (Roche), and PhosSTOP phosphatase inhibitor  
369 (Roche)] or in boiling SDS lysis buffer [1% SDS and 10 mM Tris-Cl (pH 7.5)], as  
370 previously described<sup>23</sup>. Protein concentrations were quantified using a modified Lowry  
371 assay, and equal protein amounts were loaded onto a 10% SDS-PAGE gel and  
372 separated by gel electrophoresis, followed by transfer to a nitrocellulose membrane.  
373 The membrane was stained with Ponceau S to confirm equal protein loading and then  
374 blocked in 2% BSA in Tris-buffered saline with 0.1% Tween-20 (TBST). Primary  
375 antibody incubation was done for 2 h at room temperature or, for phospho-specific  
376 antibodies, overnight at 4°C. An HRP-conjugated secondary antibody was used,  
377 followed by detection using enhanced chemiluminescence substrate (Pierce).  
378 Autoradiograph images were scanned and saved as unmodified Tiff images, and  
379 densitometry analysis was done with ImageJ (NIH) software.

380 For co-immunoprecipitation, cells were lysed in BC150 lysis buffer [20 mM Tris-HCl (pH  
381 7.5), 150 mM NaCl, 10% glycerol, 1 mM EDTA, 0.2% NP-40, and freshly added  
382 complete protease inhibitor cocktail (Roche)]. Cell lysates were incubated with primary  
383 antibody or IgG control antibody at 4°C overnight, followed by incubation with Protein A  
384 Agarose beads (Sigma-Aldrich) for 1 h at 4°C. After five washes with lysis buffer, the  
385 bound proteins were eluted from the beads in 2x Laemmli SDS sample loading buffer at  
386 95°C for 5 min and then loaded onto a 10% SDS-PAGE gel. Proteins were transferred  
387 to nitrocellulose membranes, and immunoblotting was performed as described above.

388 **Glutathione S Transferase (GST) Protein-Protein Interaction Assay**

389 Recombinant proteins, GST, GST-tagged CAD, and GST-tagged CAD fragments,  
390 shown in Fig. 2a, were purified as previously described<sup>24</sup>. HEK293T cells were  
391 transfected with pCIN4-HA-ARID1A using Lipofectamine 3000 (Invitrogen). Forty-eight  
392 hours later, the cells were lysed in lysis buffer [50 mM Tris-HCl (pH 8), 5 mM EDTA, 150  
393 mM NaCl, 0.5% NP-40, and freshly added 1 mM DTT and complete protease inhibitor  
394 cocktail (Roche)]. The HEK293T lysates were then incubated for 2 h at 4°C with 25 µg  
395 Glutathione Sepharose 4B beads (Amersham) bound to GST-CAD or its fragments.  
396 After washing in lysis buffer, bound proteins were eluted from the beads with 2x  
397 Laemmli SDS sample loading buffer at 95°C for 5 min, loaded onto a 10% SDS-PAGE  
398 gel, and then transferred to a nitrocellulose membrane and immunoblotted using the  
399 indicated primary antibodies.

400 To evaluate domain of ARID1A that potentially interacts with GST-ATCase, HEK293T  
401 cells were transfected with pCDNA6-V5/His.b (empty vector), pCDNA6-ARID1A 1-1758  
402 (N-terminus), pCDNA6-ARID1A 1759-2285 (C-terminus), or pCDNA6-ARID1A (full-  
403 length) expression plasmid using Lipofectamine 3000 (Invitrogen). Forty-eight hours  
404 later, the cells were lysed as described above. Lysates were then incubated for 2 h at  
405 4°C with 25 µg Glutathione Sepharose 4B beads (Amersham) bound to GST or GST-  
406 ATCase. After washing in lysis buffer, bound proteins were eluted from the beads in 2x  
407 Laemmli SDS sample loading buffer at 95°C for 5 min and then loaded onto an SDS-  
408 PAGE gel, followed by transfer to a nitrocellulose membrane and immunoblotting using  
409 the indicated primary antibodies.

410 **Short Hairpin RNA (shRNA)-Mediated Knockdown and Expression of *ARID1A* in**  
411 **ovarian and endometrial carcinoma cells**

412 shRNA lentiviral supernatants were produced using standard protocols, as previously  
413 described<sup>11</sup>. Vectors were transfected into HEK293FT cells using X-tremeGENE 9 DNA  
414 Transfection Reagent (Roche). Retroviral supernatants isolated at 48 h were diluted 1:1  
415 in culture medium and used to infect the *ARID1A*-wildtype ES2 and KLE cell lines.  
416 Stably transfected subclones were expanded using puromycin (Dot Scientific) drug  
417 selection. For expression of ARID1A in the *ARID1A*-mutant HEC-1-A cell line, pCIN4-  
418 HA-ARID1A was transfected using X-tremeGENE 9 DNA Transfection Reagent  
419 (Roche), followed by selection with G418 (Gibco). For expression of ARID1A in the  
420 *ARID1A*-mutant SKOV3 and OVI5E cell lines, V5/His-tagged pLenti-puro-LacZ and  
421 pLenti-puro-ARID1A were transfected using lentivirus. Lentivirus was produced using  
422 HEK293FT cells with the second-generation packaging system pSPAX2 (Addgene  
423 plasmid) and pMD2.G (Addgene plasmid). Stably transfected subclones were expanded  
424 using puromycin and blasticidin (Gibco) drug selection.

#### 425 **Targeted exon sequencing for *ARID1A***

426 *ARID1A* mutations in SKOV3, A2780, HEC-1-A and OVI5E cells were verified by  
427 Sanger sequencing using a Applied Biosystems 3730xL DNA Analyzer (Thermo Fisher  
428 Scientific, Inc.) and specific primers targeting exons 1, 2, 3, 18 and 20 (Supplementary  
429 Table S9) of the *ARID1A* (ENST00000324856) CDS region were used according to  
430 Jones, S. *et al*<sup>2</sup>. Briefly, Genomic DNA was extracted using QIAamp UCP DNA Micro Kit  
431 (Qiagen). PCR amplification with targeted primers was conducted using a touchdown  
432 PCR protocol (1 cycle of 96°C for 2 min; 3 cycles of 96°C for 10 sec, 64°C for 10 sec,  
433 70°C for 30 sec; 3 cycles of 96°C for 10 sec, 61°C for 10 sec, 70°C for 30 sec; 3 cycles  
434 of 96°C for 10 sec, 58°C for 10 sec, 70°C for 30 sec; 41 cycles of 96°C for 10 sec, 57°C

435 for 10 sec, 70°C for 30 sec; 1 cycle of 70°C for 5 min). PCR products were purified  
436 using QIAquick PCR Purification kit (Qiagen). PCR products were followed by Sanger  
437 sequencing. Mutations in *ARID1A* in those verified cell lines by Sanger sequencing was  
438 in Supplementary Table S10.

#### 439 **Knockout of *ARID1A* in ES2 cell line**

440 The CRISPR-Cas9 system was used to according to Ran *et al*<sup>25</sup>. The CRISPR/Cas9  
441 vector, pSpCas9(BB)-2A-Puro (PX459) V2.0 (ID: 62988), was obtained from Addgene  
442 (MA, USA). The target site used in this study was 5'-

443 CACCGAGGGAAGCGCTGCTGGGAAT-3' that contains a part of the *ARID1A*

444 sequence. The PAM sequence is underlined. The target sequence was inserted into the  
445 cloning site of the pSpCas9(BB)-2A-Puro (PX459) V2.0 vector. The cloned plasmid was  
446 transfected into ES2 cells using Lipofectamine 3000. ES2 cells were selected in the  
447 medium containing puromycin (1 µg/ml) 72 h after transfection and screening for single  
448 clones in about three weeks. *ARID1A*-null clones were identified by Western blotting  
449 and confirmed by Sanger sequencing the targeted genome region by PCR amplification  
450 with primers 5'-GTAAAACGACGGCCAGTTGCACGTTAGAGAACCACTCTG

451 -3' and 5'-AACAGCTATGACCATGACAACCAGCAAAGTCCTCACC

452 -3'.

#### 453 **<sup>14</sup>C aspartate incorporation into RNA and DNA**

454 Cells were plated in 60-mm dishes 48 h prior to the experiment (cells grew to 85-90%  
455 confluent when the experiment started). Fresh medium was added to the subconfluent  
456 cells, and 5  $\mu\text{Ci}$  L-[U- $^{14}\text{C}$ ]aspartic acid (0.1 mCi/mL, PerkinElmer) was added to each  
457 plate. After 6 h of incubation at 37°C, the cells were lysed, and RNA and DNA were  
458 prepared following the manufacturer's manual for the AllPrep DNA/RNA Mini Kit  
459 (Qiagen). The amounts of RNA and DNA were quantified, and the radioactivity in each  
460 sample was determined by liquid scintillation counting. [ $^{14}\text{C}$ ]Aspartate incorporation into  
461 RNA or DNA was respectively normalized to the amount of RNA or DNA and expressed  
462 as cpm/ $\mu\text{g}$  RNA or cpm/ $\mu\text{g}$  DNA.

#### 463 **Uridine Triphosphate (UTP) assay**

464 UTP was examined with an enzyme immuno-based plate-reader assay according to the  
465 manufacturer's recommendations (Aviva Systems Biology ). Briefly, cells were cultured  
466 in medium with or without drug treatment. For metabolite extraction, the medium was  
467 aspirated, and the same number of cells were collected by trypsinizing and counting.  
468 The cells were lysed by ultra-sonication (Qsonica Q125; Time: 2 min, Pulse: 15 s on/15  
469 s off, Amplitude: 50%). The insoluble material in lysates was pelleted by centrifugation  
470 at 12,000 rpm for 10 min at 4°C. The metabolite-containing supernatants were  
471 assessed using the UTP ELISA Kit. The plate was read at 450 nm with a standard  
472 microplate reader. The UTP level was calculated using the formula (Relative  $\text{OD}_{450}$ ) =  
473 (Well  $\text{OD}_{450}$ ) – (Mean Blank Well  $\text{OD}_{450}$ ).

#### 474 **Cytotoxicity assay**

475 Cells were seeded in 96-well plates, with 2000 cells in 100  $\mu\text{L}$ /well, and cultured for 24  
476 h. The cells were treated with serial dilutions of the indicated drugs or without drug for

477 an additional 72 h. The cell number was determined using the sulforhodamine B (SRB)  
478 assay, as previously described<sup>26</sup>. Briefly, cells were fixed with 20% trichloroacetic acid  
479 (TCA), air-dried, and stained with 0.4% SRB dissolved in 1% acetic acid. After washing,  
480 protein-bound dye was solubilized with 10 mM unbuffered Tris-base solution (pH 10.5)  
481 and detected at 510 nm using a microplate reader. Calculated the percentage of cell-  
482 growth using the following formula:

$$483 \quad \% \text{ cell growth} = \text{Absorbance sample} / \text{Absorbance untreated} \times 100$$

484 Using CalcuSyn software (Biosoft), dose-effect curves were generated, and the drug  
485 concentrations corresponding to a 50% decrease in cell number (IC50) were  
486 determined.

#### 487 **Immunofluorescence**

488 Cells plated on coverslips were kept in medium. For detecting proteins, coverslips were  
489 fixed with 2% paraformaldehyde for 10 min, permeabilized with 0.5% Triton X-100 for 10  
490 min, and blocked with 1% BSA in 20 mmol/L Tris-HCl (pH 7.5) for 20 min. The  
491 coverslips were then incubated with primary antibody (anti-ARID1A, 1:500; anti-CAD,  
492 1:50; or P-CAD Ser1859, 1:50) overnight at 4°C and with secondary antibody for 2 h at  
493 room temperature. For multicolor staining, an additional blocking step was conducted  
494 after the first secondary antibody staining. DAPI was used to label the nucleus. Images  
495 of cells were acquired using a BZ-X710 fluorescence microscope (KEYENCE) and  
496 analyzed using ImageJ (NIH).

#### 497 **Immunohistochemistry (IHC)**

498 IHC was performed by incubating FFPE tissue section slides in antigen retrieval solution  
499 [0.01 M sodium citrate (pH 6.0)] for 20 min in a pressure cooker. The slides were

500 blocked in blocking solution (5% goat serum and 2% BSA in TBS) for 30 min and then  
501 incubated with primary antibodies (anti-ARID1A, 1:500; anti-CAD, 1:50) overnight at  
502 4°C. The slides were then incubated with the secondary antibody from the EnVision Gl2  
503 Doublestain System (DAKO) for 10 min at room temperature, followed by DAB staining  
504 for visualization. The slides were counterstained with hematoxylin and bluing in PBS,  
505 dehydrated in graded alcohol, cleared in xylene, and coverslipped in Permount (Fisher  
506 Scientific). Images were visualized using a BZ-X710 fluorescence microscope  
507 (KEYENCE) and analyzed using ImageJ (NIH).

#### 508 **Animal model**

#### 509 **Ethics statement**

510 All animal procedures were conducted in accordance with a protocol approved by the  
511 Institutional Animal Care and Use Committee at Yale University (Protocol number:  
512 2017-20139).

513 Five mouse experiments were performed: (i) to assess the effect of teriflunomide on  
514 ES2 cells *in vivo*, (ii) to assess the effect of teriflunomide on SKOV3 cells *in vivo*, (iii) to  
515 assess the effect of teriflunomide on patient-derived xenograft model, (iv) to assess the  
516 combination effect of teriflunomide and AZD6738 on ES2-shARID1A cells *in vivo* and  
517 (v) to assess the combination effect of teriflunomide and AZD6738 on patient-derived  
518 xenograft model. The i, ii, and iv experiments were experiments using subcutaneous  
519 cell-xenograft models generated by injecting cells into the flanks of 6-week-old female  
520 athymic NCr-nu/nu mice (Charles River Laboratories). The iii and v experiments were  
521 performed using patient-derived xenografts (PDXs). *Prkdc<sup>em26Cd52</sup>Il2rg<sup>em26Cd22</sup>/NjuCrl*  
522 (NCG) mice were purchased from the Charles River. PDXs were generated by

523 sectioning of Cryo ovarian tumor tissue (Champion Oncology) and engrafting tumor  
524 chunks (5 x 5 x 5 mm) pieces subcutaneously to the 6- to 8-week-old female mice.  
525 Once the PDX tumor reached approximately 1,000 mm<sup>3</sup>, it was harvested and  
526 transplanted for expansion in next generations, which were used for *in vivo* studies.  
527 Animal-human dose translation was calculated as previously described<sup>27</sup>. Tumor  
528 volumes were measured every other day by caliper to determine tumor volume using  
529 the formula (length/2) × (width<sup>2</sup>). Animal weights were recorded, and mice were  
530 observed for any toxicities. The experiment was terminated when the mean tumor  
531 volume of the vehicle group reached 1000 mm<sup>3</sup>, and tumor xenografts were excised at  
532 the time of euthanasia. Representative samples were flash-frozen in liquid nitrogen for  
533 subsequent protein expression analysis by immunoblotting, as well as being formalin-  
534 fixed paraffin-embedded (FFPE) for subsequent hematoxylin and eosin staining and  
535 immunohistochemical analysis. FFPE sections were reviewed by the study pathologist  
536 (P.H.), and cellular necrosis was quantified as % cross-sectional area of the bisected  
537 tumor xenografts.

538 (i) To assess the effect of teriflunomide on ES2 cells, xenograft models were generated  
539 by injecting ES2-shCon or ES2-shARID1A cells (1 x 10<sup>6</sup> cells) subcutaneously. When  
540 the mean tumor volume reached approximately 100 mm<sup>3</sup>, the animals were randomized  
541 into treatment groups; mice with xenograft volume <20 mm<sup>3</sup> or >160 mm<sup>3</sup> were  
542 excluded. Teriflunomide was solubilized in DMSO and diluted to 0.5 mg/mL with PBS.  
543 Mice were treated with teriflunomide (4 mg/kg) or vehicle intraperitoneally every other  
544 day, as shown in Fig. 4d.



545 (ii) To assess the effect of teriflunomide on SKOV3 cells, xenograft models were  
546 generated by injecting SKOV3 cells [ $2 \times 10^6$  cells mixed 1:1 (v/v) with Matrigel (BD  
547 Biosciences)] subcutaneously. When the mean tumor volume reached approximately  
548  $100 \text{ mm}^3$ , the animals were randomized into treatment groups. Teriflunomide treatment  
549 was used the same way as in the ES2 xenograft models. The survival curve is shown in  
550 Fig. 4h; the terminal tumor volume was  $1000 \text{ mm}^3$ . (iii) To assess the effect of  
551 teriflunomide on patient-derived xenografts (PDXs), the animals were randomized into  
552 treatment groups once the mean tumor volume reached approximately  $100 \text{ mm}^3$ .  
553 Teriflunomide treatment was used the same way as in the ES2 xenograft models.  
554 Tumor size was monitored every four days by a caliper, as shown in Fig. 4i. The  
555 terminal tumor volume was  $1000 \text{ mm}^3$ .

556 (iv) To assess the combination effect of teriflunomide and AZD6738 on ES2-shARID1A  
557 cells *in vivo*, xenograft models were generated by injecting ES2-shARID1A cells [ $2 \times 10^6$   
558 cells mixed 1:1 (v/v) with Matrigel (BD Biosciences)] subcutaneously. Treatment with  
559 was initiated 24 h after tumor injection, the animals were randomized into treatment  
560 groups. Teriflunomide treatment was used the same way as in the ES2 xenograft  
561 models. AZD6738 was solubilized in DMSO and diluted to 0.5 mg/mL with 10% 2-  
562 hydroxypropyl- $\beta$ -cyclodextrin. Treatment with AZD6738 (25 mg/kg) or vehicle was  
563 performed daily by oral gavage, as shown in Fig. 5l.

564 (v) To assess the combination effect of teriflunomide and AZD6738 on patient-derived  
565 xenografts (PDXs), ARID1A deficient ovarian tumor tissues (Champion Oncology, CTG-  
566 2213) were used in the study. The animals were randomized into treatment groups once  
567 the mean tumor volume reached approximately  $100 \text{ mm}^3$ . Teriflunomide and AZD6738

568 treatment was used the same way as in the ES2 xenograft models. Tumor size was  
569 monitored every four days by a caliper, as shown in Fig. 5m. The terminal tumor volume  
570 was 500 mm<sup>3</sup> in vehicle group.

### 571 **Statistics**

572 An independent-samples t-test was applied when two groups of data were compared.  
573 Multiple-group comparisons were done using one-way analysis of variance (ANOVA)  
574 with Tukey's post-test. Statistical analyses and graphing were performed using SPSS  
575 22 (IBM) and Prism 7 (GraphPad). *P*-values less than 0.05 were considered significant.

### 576 **Acknowledgements**

577 Funding for this research was provided by the Department of Defense Ovarian Cancer  
578 Research Program Award W81XWH-16-1-0196 and the Reproductive Scientist  
579 Development Program Seed Grant to G. S. Huang. We thank Dr. Jennifer T. Aguilan  
580 and the comprehensive mass spectrometry services provided by the Proteomics Shared  
581 Resource of the Albert Einstein College of Medicine, supported by the Cancer Center  
582 Support Grant (NCI P30 CA013330). We thank the Shared Resources of the Yale  
583 Cancer Center, supported by the Cancer Center Support Grant (NCI P30 P30  
584 CA016359), and the YCC Scientific Publication Program supported by The Sands  
585 Family Foundation. We thank Dr. Ie-Ming Shih for providing ARID1A vectors and short  
586 hairpin RNA vectors used in this study. We acknowledge the Yale Genome Editing  
587 Center for providing custom CRISPR/Cas constructs. We thank Dr. Susan Band Horwitz  
588 for helpful discussions.

589

### 590 **Disclosure of Potential Conflicts of Interest**

591 G.S. Huang has received consulting fees/speaking honoraria from Bristol-Myers Squibb,  
592 Tesaro, and AstraZeneca Inc; these activities are unrelated to the work described in this  
593 manuscript. G.S. Huang is the inventor on a provisional patent filed by Yale University,  
594 related to work described in this manuscript. No potential conflicts of interest were  
595 disclosed by the other authors.

596

### 597 **Authors' Contributions**

598 **Conception and design:** G.S. Huang, Z. Li, S. Mi

599 **Development of methodology:** Z. Li, S. Mi, C-P.H. Yang, G.S. Huang

600 **Acquisition of data (provided animals, acquired and managed patients, provided**

601 **facilities, etc.):** Z. Li, S. Mi, O.I. Osagie, J. Ji, C-P.H. Yang, M. Schwartz, P. Hui, G.S.

602 Huang

603 **Analysis and interpretation of data (e.g., statistical analysis, biostatistics,**

604 **computational analysis):** Z. Li, S. Mi, O.I. Osagie, J. Ji, C-P.H. Yang, M. Schwartz, P.

605 Hui, G.S. Huang

606 **Writing, review, and/or revision of the manuscript:** Z. Li, S. Mi, O.I. Osagie, J. Ji, C-

607 P.H. Yang, M. Schwartz, P. Hui, G.S. Huang

608 **Study supervision:** G.S. Huang

609

### 610 **Current Affiliations**

611 Shijun Mi, Laboratory of Personalized Genomic Medicine, Department of Pathology &

612 Cell Biology, Columbia University Medical Center, New York. Jing Ji, Department of

613 Obstetrics & Gynecology, the First Affiliated Hospital of Medical School, Xi'an Jiaotong

614 University, Xi'an 710061, The People's Republic of China. Oloruntoba I. Osagie,  
615 Queen's University Belfast, Northern Ireland, United Kingdom. Melissa Schwartz,  
616 Department of Obstetrics, Gynecology and Women's Health, Division of Gynecologic  
617 Oncology, Saint Louis University School of Medicine, St. Louis, Missouri.

618

619 **Corresponding Author**

620 Correspondence to G.S. Huang ([gloria.huang@yale.edu](mailto:gloria.huang@yale.edu)).

621

622

623

624

625

626

627

628

629

630

631

632

633

634

635

636

637

638

639 **Figures**

640

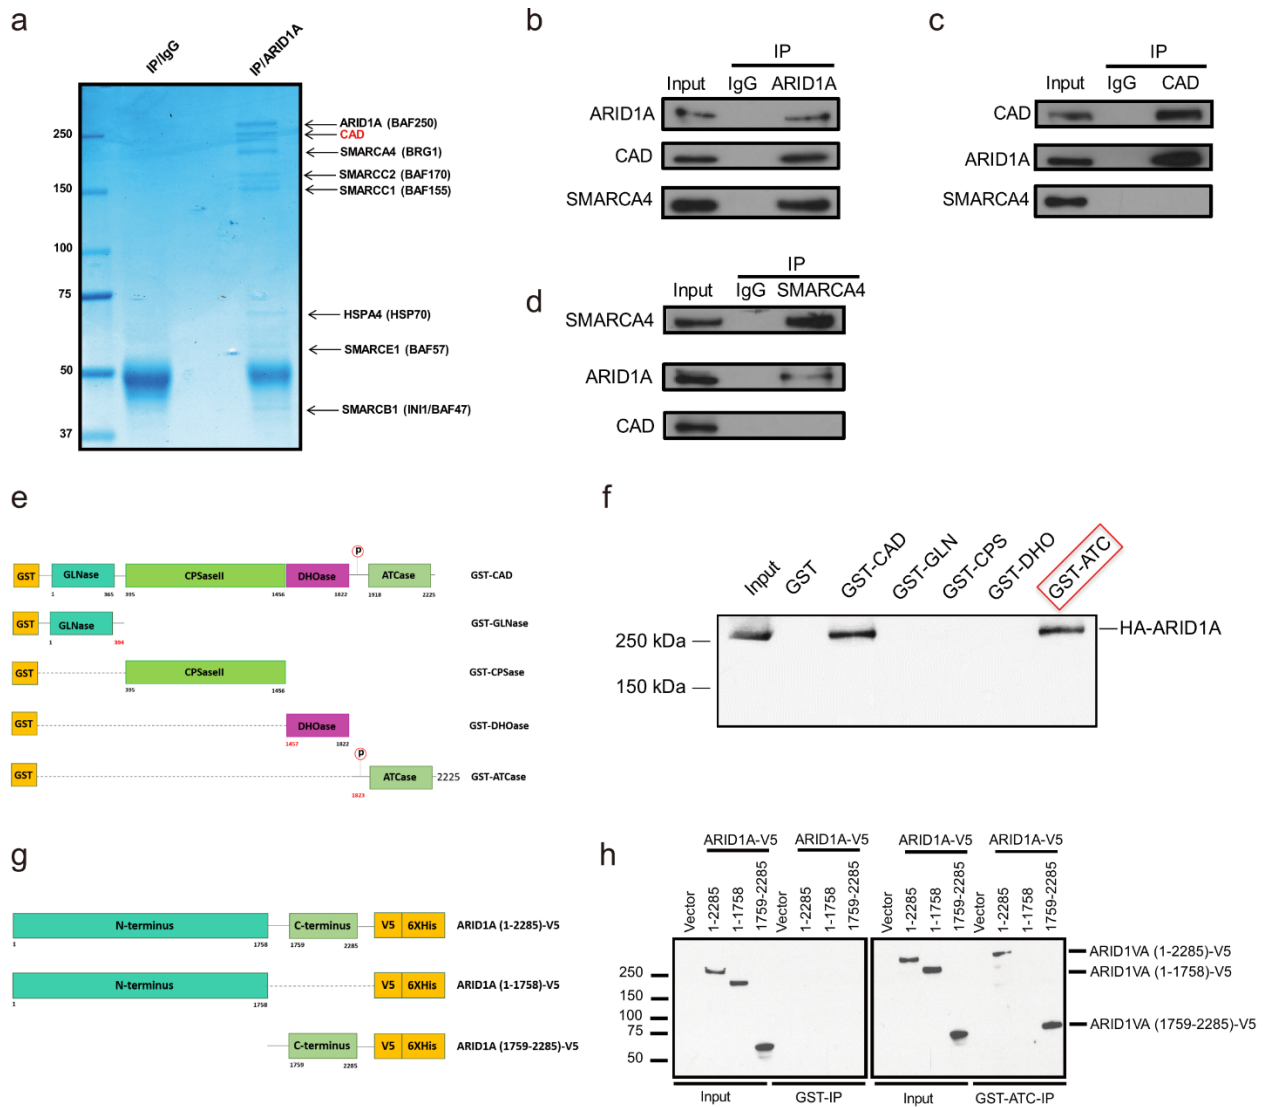

641

642 **Figure 1. ARID1A interacts with CAD.**

643 **a**, Coomassie blue staining of ARID1A complex immunopurified from an *ARID1A*-  
644 wildtype cell line (KLE) is shown in the right lane, and immunopurified control IgG  
645 complex is shown in the left lane. Arrows designate protein band identification by LC-

646 MS/MS, with black text for ARID1A and SWI/SNF family members and red text for the  
647 multifunctional enzyme CAD.

648 **b-d**, Endogenous protein-protein interactions in an *ARID1A*-wildtype cell line (ES2)  
649 were assessed. Immunoprecipitation with the indicated antibody or control IgG antibody  
650 was performed, and immunoprecipitated proteins were detected by immunoblotting. At  
651 least two independent experiments were done, and representative immunoblots are  
652 shown. In **(b)**, immunoprecipitation was done using an anti-ARID1A antibody. Both CAD  
653 and the core SWI/SNF subunit SMARCA4 co-immunoprecipitate with ARID1A. In **(c)**,  
654 immunoprecipitation was done using an anti-CAD antibody. Endogenous ARID1A, but  
655 not SMARCA4, co-immunoprecipitates with CAD. In **(d)**, immunoprecipitation was done  
656 using an anti-SMARCA4 antibody. Endogenous ARID1A, but not CAD, co-  
657 immunoprecipitates with SMARCA4.

658 **e**, Recombinant, glutathione S-transferase (GST)-tagged proteins were made to  
659 express full-length CAD or one of four unique non-overlapping CAD fragments. Each of  
660 the CAD fragments contains a functional enzyme component, as shown. CAD fusion  
661 proteins were expressed in bacteria.

662 **f**, Whole-cell lysates were prepared using HEK293T cells made to express HA-tagged  
663 full-length ARID1A. Shown are the results of a GST pulldown assay using recombinant  
664 GST-CAD fusion proteins (shown in A), followed by immunoblotting using an anti-HA  
665 antibody to detect HA-ARID1A. Recombinant full-length GST-CAD and the GST-  
666 ATCase domain demonstrated *in vitro* binding to HA-tagged ARID1A.

667 **g**, Recombinant ARID1A-V5 fusion proteins were made for expression of full-length  
668 ARID1A (1-2285), N-terminal ARID1A (1-1758), or C-terminal ARID1A (1759-2285) in  
669 HEK293T cells.

670 **h**, The GST-ATCase fusion protein (but not the control GST protein assessed on the left  
671 side of the panel) demonstrated *in vitro* binding to V5-tagged, full-length ARID1A (1-  
672 2285) and to C-terminal ARID1A (1759-2285), but not to N-terminal ARID1A (1-1758).  
673 These data indicate that the protein-protein interaction of ARID1A and CAD is localized  
674 to the C-terminal regions of both CAD (ATCase domain, 1823-2225) and ARID1A  
675 (1759-2285).  
676

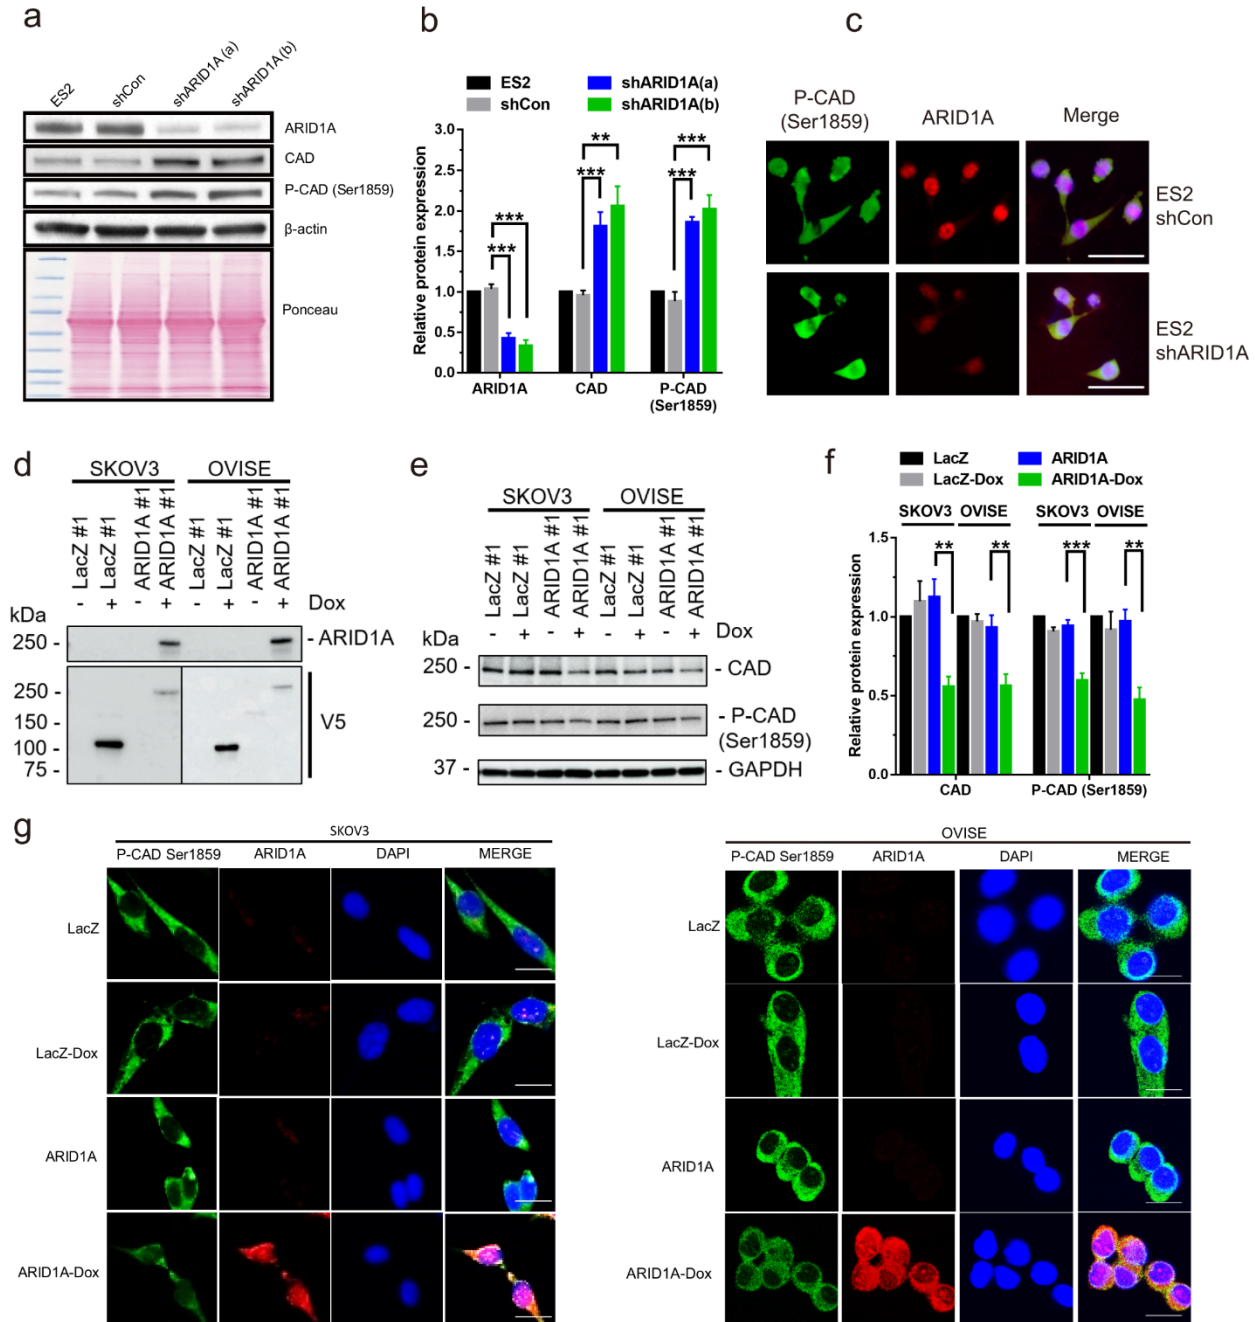

677

678 **Figure 2. ARID1A is a negative regulator of CAD.**

679 **a**, Immunoblotting using an anti-ARID1A antibody shows knockdown of *ARID1A* protein  
 680 expression following stable transfection with short hairpin RNAs, shARID1A(a) and  
 681 shARID1A(b), compared with control transfection with a non-targeting short hairpin  
 682 RNA, shCon. Protein expression levels of total CAD and phosphorylated CAD increased  
 683 in the *ARID1A*-knockdown cells compared to control cells, as shown by immunoblotting  
 684 with anti-CAD and anti-phosphorylated-CAD antibodies. Equal protein loading is shown

685 by immunoblotting with an anti- $\beta$ -actin antibody and Ponceau staining of the  
686 nitrocellulose membrane. At least five independent experiments were done, and  
687 representative results are shown.

688 **b**, Quantitation of immunoblotting images in **a** by Image J. Data represent mean  $\pm$   
689 s.e.m,  $n = 3$  independent experiments. One-way ANOVA with Tukey's post-test;  $**P <$   
690  $0.01$ ,  $***P < 0.001$ .

691 **c**, Representative immunofluorescence staining of ES2 cells for phosphorylated CAD  
692 Ser1859 (green) and ARID1A (red) is shown. P-CAD Ser1859 protein increased in the  
693 *ARID1A*-knockdown cells compared to control cells. Nuclei are indicated by DAPI  
694 staining. Scale bar, 40  $\mu\text{m}$ .

695 **d**, Immunoblotting shows restoration of ARID1A protein expression following stable  
696 transfection with Lenti-puro-ARID1A-V5 (ARID1A) compared with control transfection  
697 with non-targeting Lenti-puro-LacZ-V5 (LacZ). Protein expression levels of ARID1A and  
698 V5 tag in the ARID1A-restoration cells compared to control cells were shown by  
699 immunoblotting with anti-ARID1A and anti-V5 antibodies. At least three independent  
700 experiments were done, and representative results are shown.

701 **e**, To evaluate the effect of ARID1A on CAD protein, immunoblotting using anti-CAD  
702 and anti-CAD Ser1859 antibodies was performed. CAD and phosphorylated CAD  
703 protein expression decreased following stable transfection with Lenti-puro-ARID1A  
704 (ARID1A) compared with control transfection with non-targeting Lenti-puro-LacZ (LacZ).  
705 Equal protein loading is shown by immunoblotting with an anti-GAPDH antibody. At  
706 least three independent experiments were done, and representative results are shown.

707 **f**, Quantitation of immunoblotting images in **d** by Image J. Data represent mean  $\pm$  s.e.m,  
708  $n = 3$  independent experiments. One-way ANOVA with Tukey's post-test;  $**P < 0.01$ ,  
709  $***P < 0.001$ .

710 **g**, Representative immunofluorescence staining of the SKOV3 (left) and OVISE (right)  
711 cell lines for phosphorylated CAD Ser1859 (green) and ARID1A (red) is shown. P-CAD  
712 Ser1859 protein decreased in the ARID1A-restoration cells following induction by  
713 doxycycline (Dox) for 2 days compared to control cells. Nuclei are indicated by DAPI  
714 staining. Scale bar, 20  $\mu\text{m}$ .

715

716

717

718

719

720

721

722

723

724



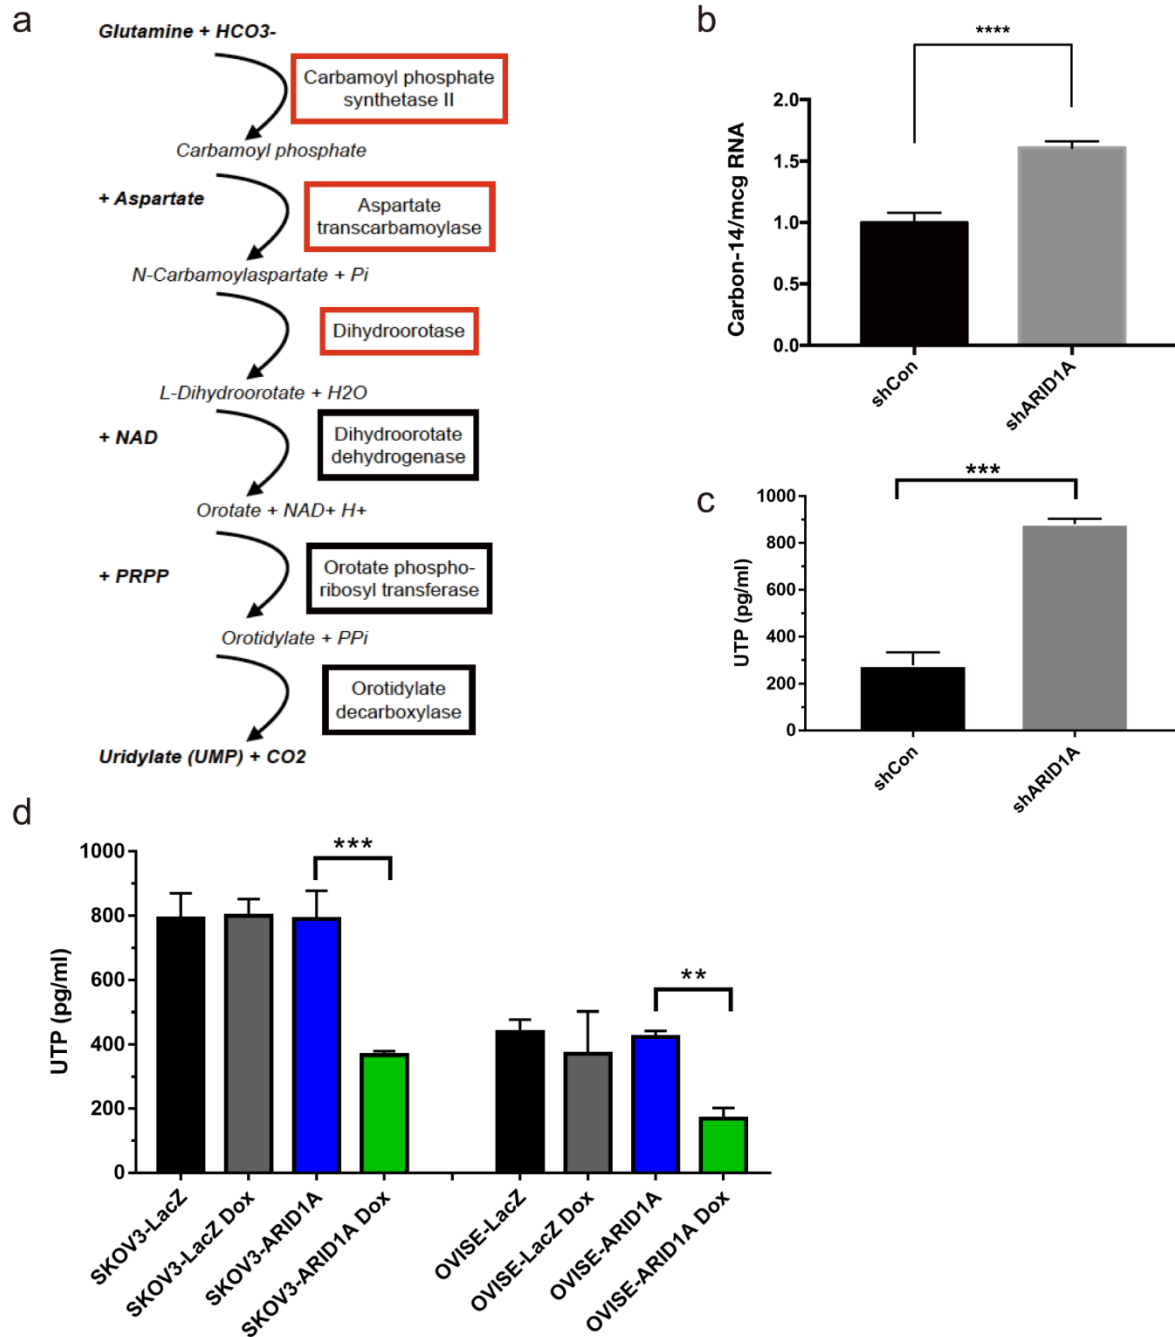

725

726 **Figure 3. ARID1A deficiency promotes *de novo* pyrimidine synthesis.**

727 **a**, The diagram shows the steps in the *de novo* pyrimidine synthesis pathway. Aspartate  
 728 is incorporated by aspartate transcarbamoylase in the second step of *de novo*  
 729 pyrimidine synthesis.

730 **b**, To evaluate the effect of *ARID1A* knockdown on *de novo* pyrimidine synthesis,  
 731 carbon-14-labeled aspartate was added to the growth media. After a 6-hour incubation,  
 732 RNA was isolated from the cells, and carbon-14 incorporation into the RNA was

733 quantified as the counts per minute (cpm) measured by a scintillation counter and was  
734 normalized to the amount of RNA (micrograms). The bar graph shows increased  
735 carbon-14 incorporation into RNA in *ARID1A*-knockdown cells relative to control cells.  
736 The mean  $\pm$  SD calculated from two independent experiments, each performed in two to  
737 four biological replicates, is shown. \*\*\*\* $P < 0.0001$ , two-tailed *t*-test.

738 **c**, The cellular UTP level was evaluated in *ARID1A*-knockdown cells. UTP increased in  
739 *ARID1A*-knockdown ES2 cells relative to control cells transfected with a non-targeting  
740 short hairpin RNA, shCon. The UTP level in ES2 parental and another *ARID1A*-  
741 Knockdown ES2 cells show similar result (Fig. S3a). Teriflunomide (Teri) treatment  
742 decreased UTP in the ES2 panel (Fig. S3b). Differences in UTP were evaluated using  
743 one-way ANOVA with Tukey's post-test; \*\*\* $P < 0.001$ .

744 **d**, UTP decreased in *ARID1A*-restoration cell lines (SKOV3, left, and OVISE, right)  
745 following induction by doxycycline (Dox) compared with control cells transfected with  
746 non-targeting Lenti-puro-LacZ (LacZ). Differences in UTP were evaluated using one-  
747 way ANOVA with Tukey's post-test; \*\* $P < 0.01$ , \*\*\* $P < 0.001$ .

748

749

750

751

752

753

754

755

756

757

758

759

760

761

762

763

764

765

766

767

768

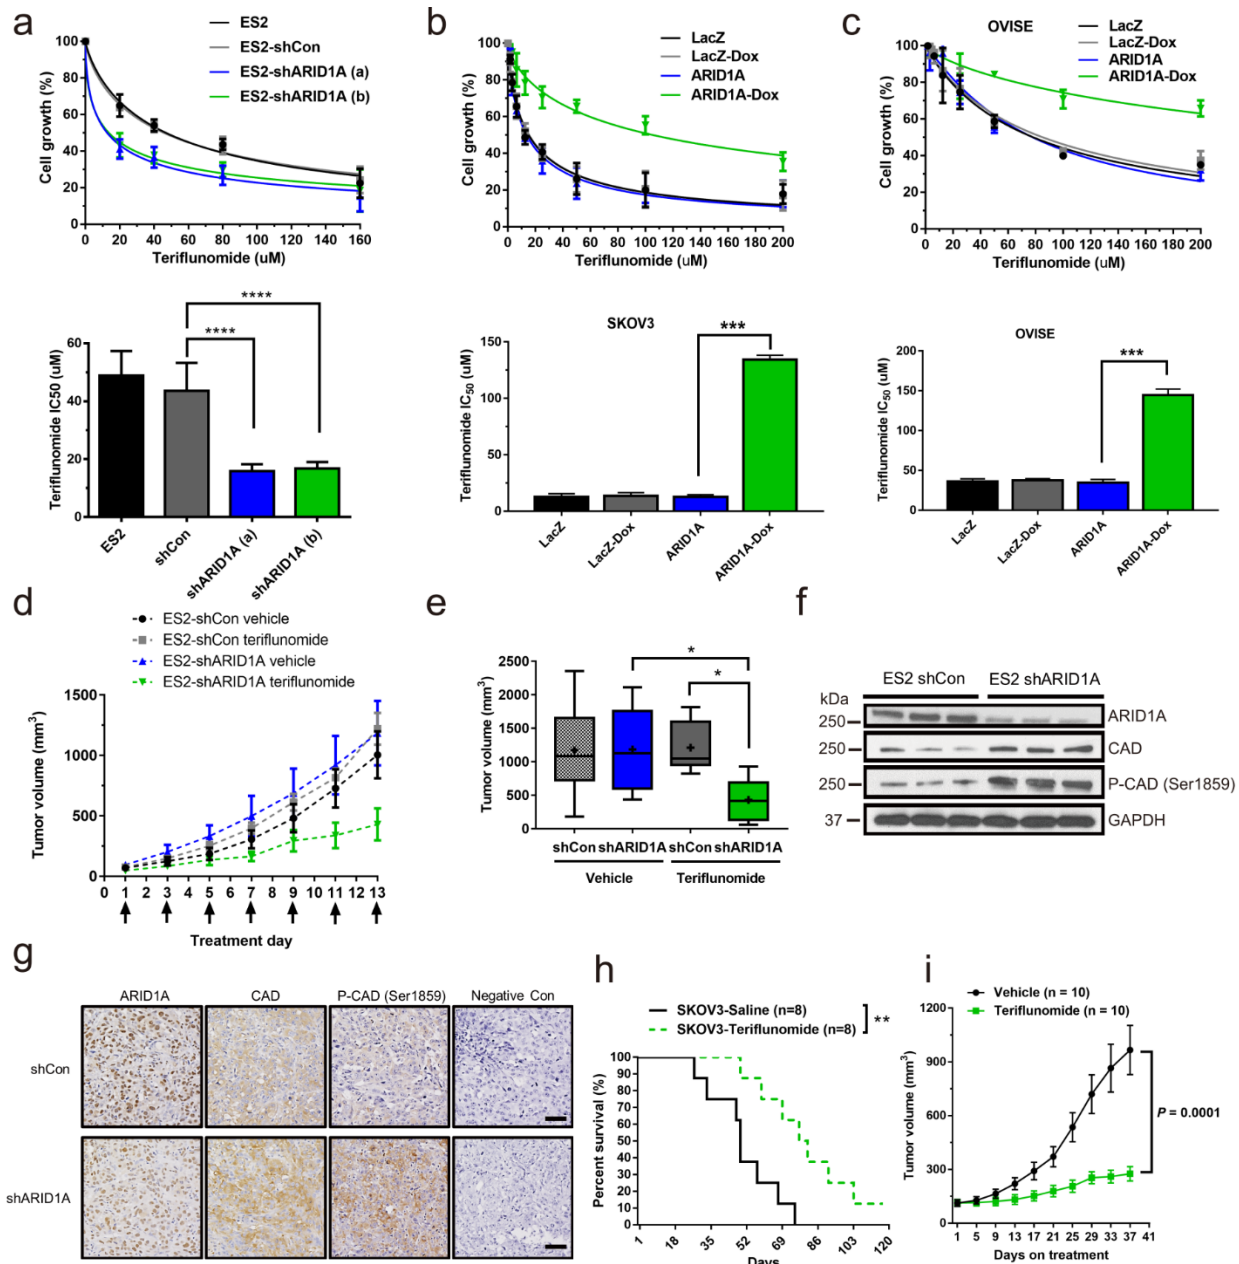

769

770 **Figure 4. ARID1A-deficient cells and tumors display sensitization to *de novo***  
 771 **pyrimidine synthesis blockade therapy.**

772 **a**, In the upper panel, the effect of teriflunomide in ES2 cells is quantified by showing  
 773 the relative cell number following drug treatment at various concentrations for 72 h.  
 774 ARID1A-knockdown cells, depicted by the blue line for shARID1A (a) and the green line  
 775 for shARID1A (b), were more sensitive to teriflunomide, resulting in a decreased cell  
 776 number following drug treatment, compared to untransfected cells (black line) or shCon  
 777 cells (gray line). In the lower panel, the data shown in the upper panel was summarized  
 778 by graphing the teriflunomide concentration that results in a 50% growth inhibitory effect  
 779 (IC<sub>50</sub>). The bars depict the mean IC<sub>50</sub> ± SD for five independent experiments.

780 Differences in IC<sub>50</sub> were evaluated using one-way ANOVA with Tukey's post-test; \*\*\*\**P*  
781 < 0.001.

782 **b**, In the upper panel, the effect of teriflunomide is quantified in a single-clone SKOV3  
783 cell line that was stably transfected with Lenti-puro-ARID1A-V5 (ARID1A) compared  
784 with control cells transfected with non-targeting Lenti-puro-LacZ-V5 (LacZ). ARID1A-  
785 restoration cells induced by doxycycline (Dox) (green line) were more resistant to  
786 teriflunomide, resulting in an increased cell number following drug treatment, compared  
787 to uninduced cells (blue line). In the lower panel, the data shown in the upper panel was  
788 summarized by graphing the IC<sub>50</sub>. The bars depict the mean IC<sub>50</sub> ± SD for three  
789 independent experiments. Differences in IC<sub>50</sub> were evaluated using one-way ANOVA  
790 with Tukey's post-test; \*\*\**P* < 0.001.

791 **c**, In the upper panel, the effect of teriflunomide is quantified in a single-clone OVISE  
792 cell line that was stably transfected with Lenti-puro-ARID1A-V5 (ARID1A) compared  
793 with control cells transfected with non-targeting Lenti-puro-LacZ-V5 (LacZ). ARID1A-  
794 restoration cells induced by Dox (green line) were more resistant to teriflunomide,  
795 resulting in an increased cell number following drug treatment, compared to uninduced  
796 cells (blue line). In the lower panel, the data shown in the upper panel was summarized  
797 by graphing the IC<sub>50</sub>. The bars depict the mean IC<sub>50</sub> ± SD for three independent  
798 experiments. Differences in IC<sub>50</sub> were evaluated using one-way ANOVA with Tukey's  
799 post-test; \*\*\*\**P* < 0.001.

800 **d**, The effect of teriflunomide was evaluated *in vivo* by treating xenograft-bearing mice  
801 every other day for 13 days (black arrows). The effect of teriflunomide on tumor  
802 xenograft growth is shown by depiction of the mean tumor volume ± SD (N=6 to 8  
803 animals/group) for each of the following groups: shCon treated with vehicle (black line),  
804 shARID1A treated with vehicle (blue line), shCon treated with teriflunomide (gray line),  
805 and shARID1A treated with teriflunomide (green line). Teriflunomide effectively inhibited  
806 tumor growth of shARID1A xenografts (green line), but not shCon xenografts (gray line).

807 **e**, The data shown in (d) are summarized by graphing the terminal tumor volumes. The  
808 bars depict the median (middle line) and mean (+) tumor volumes for each group.  
809 Differences between groups were evaluated using one-way ANOVA with Tukey's post-  
810 test; \**P* < 0.05.

811 **f**, ARID1A, CAD, and phospho-CAD Ser1859 protein expression was evaluated in  
812 representative tumor xenograft cell lysates by immunoblotting. *ARID1A*-knockdown  
813 xenografts (shARID1A) showed decreased ARID1A protein levels and increased CAD  
814 and phospho-CAD protein levels. Equal protein loading was confirmed by Ponceau  
815 staining of the nitrocellulose membrane (not shown) and immunoblotting with an anti-  
816 GAPDH antibody.

817 **g**, Representative immunohistology staining of xenograft tumor tissue sections for  
818 ARID1A, CAD, and phosphorylated CAD Ser1859 is shown. The negative-control  
819 samples underwent the same immunohistology staining procedure but without primary  
820 antibody incubation. Similar upregulation of CAD and P-CAD Ser1859 was observed in  
821 the *ARID1A*-knockdown xenograft tumor samples. Scale bar, 50 μm.

822 **h**, The effect of teriflunomide was evaluated in an *ARID1A*-deficient SKOV3 tumor  
823 xenograft model. The xenograft model was generated by subcutaneously injecting  
824 SKOV3 cells in Matrigel (1:1) into athymic nude mice. Teriflunomide (4 mg/kg) or  
825 vehicle was intraperitoneally injected every other day. Tumor size was recorded on the  
826 same day. A survival curve is shown; the terminal tumor volume is 1000 mm<sup>3</sup>.  
827 Teriflunomide improved the survival of the tumor-bearing mice. The *P* value was  
828 calculated via two-tailed *t*-test. \*\**P* < 0.01. The effect of teriflunomide on an ES2-shCon  
829 tumor xenograft model is shown in Figure S6.

830 **i**, PDXs (CTG-2213; *ARID1A* truncating mutation at Gln211\*) were randomized into  
831 vehicle control and Teriflunomide (4 mg/kg every other day). Tumor volume was  
832 measured every four days. There was a significant decrease in treatment group relative  
833 to control (*P* = 0.0001). The effect of teriflunomide on animal weight and individual  
834 tumor growth is shown in Supplementary Fig. S7.

835

836

837

838

839

840

841

842

843

844

845

846

847

848

849

850

851

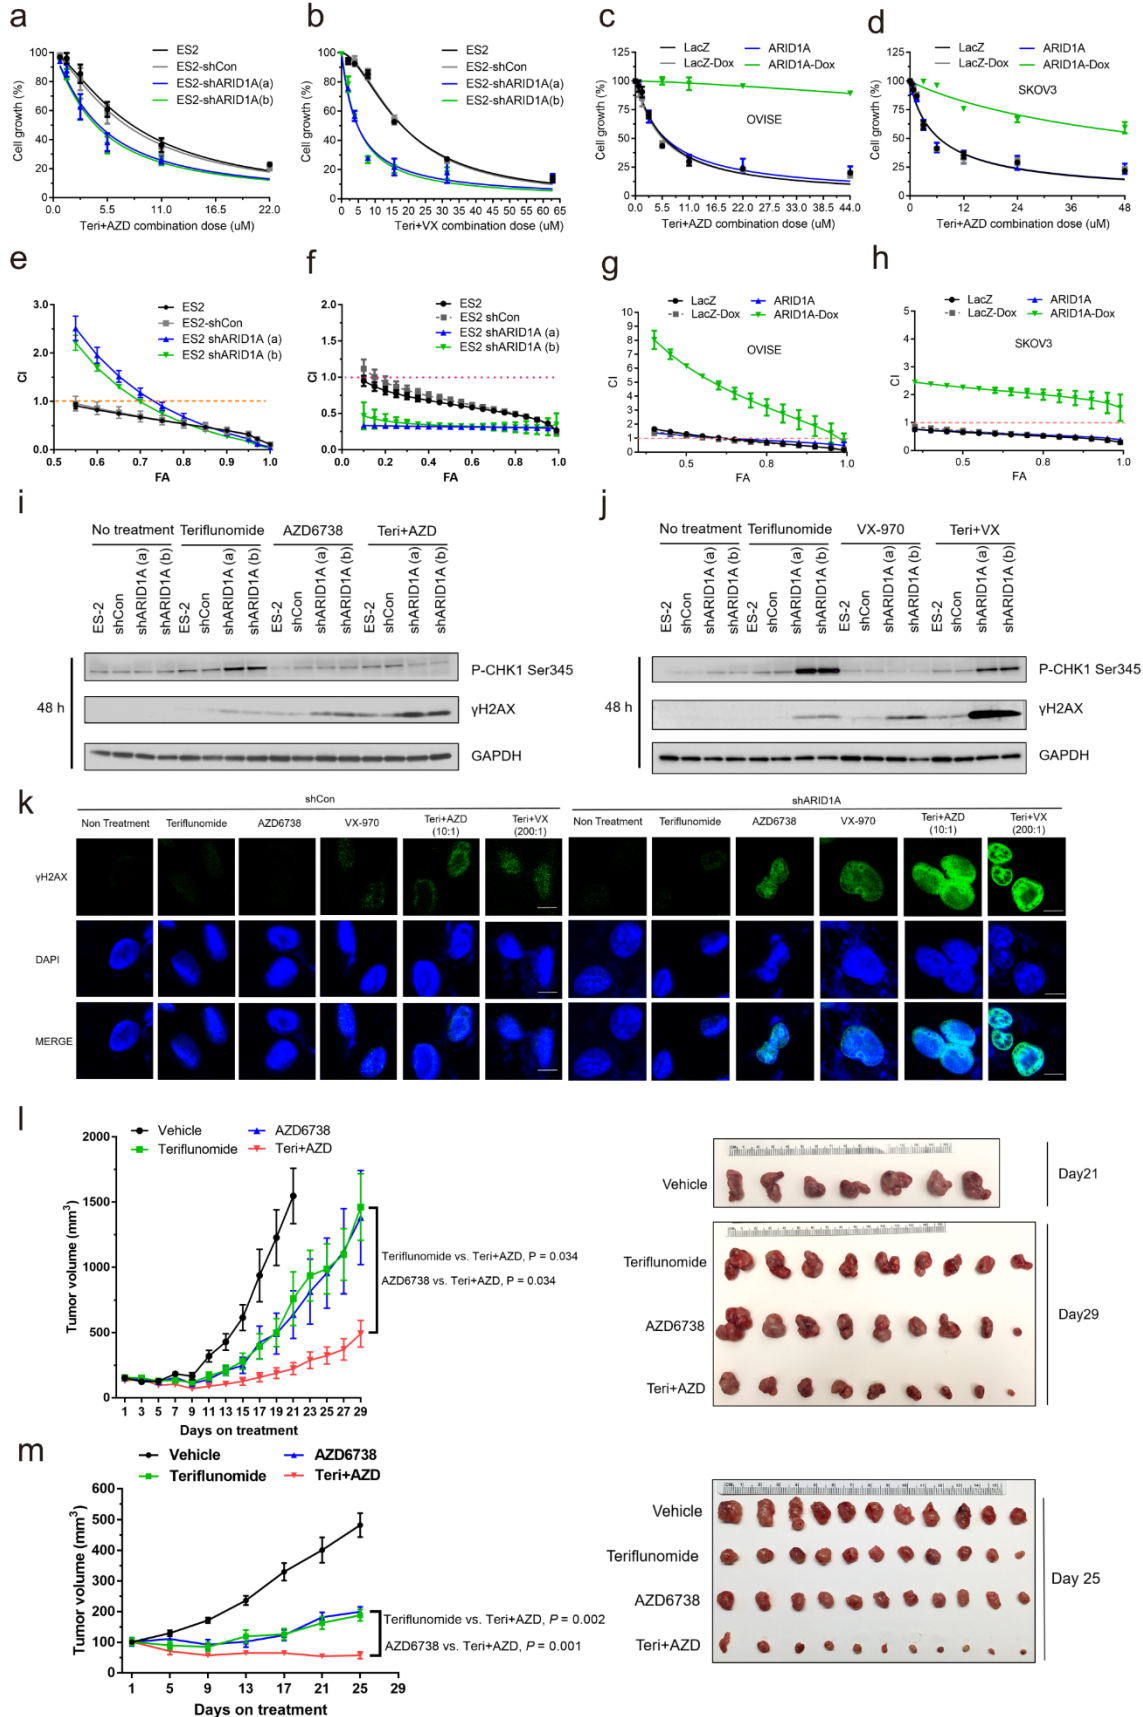

853 **Figure 5. Combination treatment with DHODHi and ATRi shows a synergistic**  
854 **effect in ARID1A-deficient cells.**

855 **a**, The effect of combination treatment of ES2 cells with teriflunomide and AZD6738 for  
856 72 h is quantified. *ARID1A*-knockdown cells, depicted by the blue line for shARID1A (a)  
857 and the green line for shARID1A (b), were even more sensitive to combination  
858 treatment compared to untransfected cells (black line) or shCon cells (gray line).  
859 Representative images of cell morphology at 72 h are shown in Supplementary Figure  
860 S8.

861 **b**, The effect of combination treatment of ES2 cells with teriflunomide and VX-970 for 72  
862 h is quantified. *ARID1A*-knockdown cells, as depicted by the blue line for shARID1A (a)  
863 and the green line for shARID1A (b), are even more sensitive to combination treatment  
864 compared to untransfected cells (black line) or shCon cells (gray line).

865 **c**, The effect of combination treatment of ARID1A-restoration OVISE cells with  
866 teriflunomide and AZD6738 for 72 h is quantified. ARID1A-induced cells (ARID1A-Dox),  
867 depicted by the green line, were even more resistant to combination treatment  
868 compared to non-ARID1A-induced cells.

869 **d**, The effect of combination treatment of ARID1A-restoration SKOV3 cells with  
870 teriflunomide and AZD6738 for 72 h is quantified. ARID1A-induced cells (ARID1A-Dox),  
871 depicted by the green line, were even more resistant to combination treatment  
872 compared to non-ARID1A-induced cells.

873 **e-h**, The data shown in (a-c) are summarized by graphing FA-CI plots, with x = fraction  
874 affected (FA) vs. y = combination index (CI) (the Chou-Talalay plot). The FA-CI curves  
875 showed the detail synergic effect at each drug concentration.  $CI < 1$ ,  $= 1$ , and  $> 1$   
876 indicate synergism, an additive effect, and antagonism, respectively. Detailed analyses  
877 of the combination treatments in (a), (b), (c) and (d) are shown in Supplementary  
878 Tables S1, S5, S6 and S7, respectively.

879 **i**,  $\gamma$ -H2AX protein expression was evaluated in ES2 cell lysates by immunoblotting at  
880 both 48 h and 72 h. Teriflunomide (15  $\mu$ M) and AZD6738 (1.5  $\mu$ M) were used in single-  
881 drug and combination treatment groups. The target effect of AZD6738 on P-CHK1  
882 Ser345 was decreased. *ARID1A*-knockdown cells (shARID1A) in the single-drug  
883 treatment groups showed increased  $\gamma$ -H2AX protein levels, but the highest levels were  
884 in the Teri+AZD combination treatment group. Equal protein loading was confirmed by  
885 immunoblotting with an anti-GAPDH antibody.

886 **j**, The Teriflunomide+VX-970 combination treatment effect was evaluated by detecting  
887  $\gamma$ -H2AX protein expression in ES2 cell lysates by immunoblotting at both 24 h and 48 h.  
888 The target effect of VX-970 on P-CHK1 Ser345 was decreased. Teriflunomide (15  $\mu$ M)  
889 and VX-970 (0.075  $\mu$ M) were used in single-drug and combination treatment groups.  
890 *ARID1A*-knockdown cells (shARID1A) showed increased  $\gamma$ -H2AX protein levels in the  
891 single-drug treatment groups, but the highest levels were in the combination treatment  
892 group. Equal protein loading was confirmed by immunoblotting with an anti-GAPDH  
893 antibody.

894 **k**, Representative immunofluorescence staining of ES2 cells for  $\gamma$ -H2AX (green) and  
895 DAPI (blue) at 24 h. Teriflunomide (15  $\mu$ M), AZD6738 (1.5  $\mu$ M), and VX-970 (0.075  $\mu$ M)

896 were used in single-drug and combination treatment groups. *ARID1A*-knockdown cells  
897 (shARID1A) showed increased  $\gamma$ -H2AX protein levels following single-drug treatment  
898 groups, but the highest levels were in the combination treatment group. Scale bar, 10  
899  $\mu$ m.

900 **l**, The effect of combination treatment with teriflunomide and AZD6738 was evaluated *in*  
901 *vivo* by treating ES2-shARID1A xenograft-bearing mice. The effect on tumor xenograft  
902 growth is shown by depiction of the mean tumor volume  $\pm$  s.e.m. (N=7 to 9  
903 animals/group) for each of the following groups: vehicle (black line, N=7), teriflunomide  
904 (green line, N=9), AZD6738 (blue line, N=9), and teriflunomide and AZD6738 (red line,  
905 N=9). Teriflunomide (4 mg/kg) or vehicle was intraperitoneally injected every other day.  
906 AZD6738 (25 mg/kg) or vehicle was given by oral gavage every day. Combination  
907 treatment more effectively inhibited tumor growth of shARID1A xenografts (red line)  
908 compared to single-drug-treated xenografts (green and blue lines). Images of all ES2-  
909 shARID1A xenografts treated with vehicle control, teriflunomide, AZD6738, or  
910 teriflunomide plus AZD6738 is shown on the right side. The images are from the  
911 endpoint of scheduled treatment. The vehicle group reached maximum tumor on day  
912 21. Tumor size on day 29 showed that Combination treatment more effectively inhibited  
913 tumor growth of shARID1A xenografts compared to single-drug-treated xenografts.  
914 Analysis of the correlation of tumor weight with tumor volume in each group is shown in  
915 Supplementary Figure S11.

916 **m**, The effect of combination treatment with teriflunomide and AZD6738 was evaluated  
917 in PDXs (CTG-2213; ARID1A truncating mutation at Gln211\*). The effect on tumor  
918 xenograft growth is shown by depiction of the mean tumor volume  $\pm$  s.e.m. (N=11  
919 animals/group) for each of the following groups: vehicle (black line), teriflunomide  
920 (green line), AZD6738 (blue line), and teriflunomide plus AZD6738 (red line).  
921 Combination treatment more effectively inhibited tumor growth (red line) compared to  
922 single-drug-treated xenografts (green and blue lines). The images of all PDXs treated  
923 with vehicle control, teriflunomide, AZD6738, or teriflunomide plus AZD6738 on the right  
924 side. The images are from the endpoint of scheduled treatment on day 25. The  
925 combination treatment more effectively inhibited tumor growth of shARID1A xenografts  
926 compared to single-drug-treated xenografts. Analysis of the correlation of tumor weight  
927 with tumor volume in each group is shown in Supplementary Figure S11.

928

929

930

931

932

933

934

935

936



937 **REFERENCES**

- 938 1 Wiegand, K. C. *et al.* ARID1A mutations in endometriosis-associated ovarian  
939 carcinomas. *New England Journal of Medicine* **363**, 1532-1543 (2010).
- 940 2 Jones, S. *et al.* Frequent mutations of chromatin remodeling gene ARID1A in  
941 ovarian clear cell carcinoma. *Science* **330**, 228-231 (2010).
- 942 3 Wu, R.-C., Wang, T.-L. & Shih, I.-M. The emerging roles of ARID1A in tumor  
943 suppression. *Cancer biology & therapy* **15**, 655-664 (2014).
- 944 4 Maeda, D. *et al.* Clinicopathological significance of loss of ARID1A immunoreactivity  
945 in ovarian clear cell carcinoma. *International journal of molecular sciences* **11**,  
946 5120-5128 (2010).
- 947 5 Wilson, B. G. & Roberts, C. W. SWI/SNF nucleosome remodellers and cancer.  
948 *Nature Reviews Cancer* **11**, 481 (2011).
- 949 6 Li, J. *et al.* Epigenetic driver mutations in ARID1A shape cancer immune phenotype  
950 and immunotherapy. *The Journal of Clinical Investigation* (2020).
- 951 7 Katagiri, A. *et al.* Loss of ARID1A expression is related to shorter progression-free  
952 survival and chemoresistance in ovarian clear cell carcinoma. *Modern Pathology*  
953 **25**, 282-288 (2012).
- 954 8 Forbes, S. A. *et al.* COSMIC: somatic cancer genetics at high-resolution. *Nucleic*  
955 *Acids Research* **45**, D777-D783 (2016).
- 956 9 Anglesio, M. S. *et al.* Type-specific cell line models for type-specific ovarian cancer  
957 research. *PloS one* **8**, e72162 (2013).
- 958 10 Dykhuizen, E. C. *et al.* BAF complexes facilitate decatenation of DNA by  
959 topoisomerase II $\alpha$ . *Nature* **497**, 624 (2013).
- 960 11 Guan, B., Wang, T.-L. & Shih, I.-M. ARID1A, a factor that promotes formation of  
961 SWI/SNF-mediated chromatin remodeling, is a tumor suppressor in gynecologic  
962 cancers. *Cancer research* **71**, 6718-6727 (2011).
- 963 12 Ben-Sahra, I., Howell, J. J., Asara, J. M. & Manning, B. D. Stimulation of de novo  
964 pyrimidine synthesis by growth signaling through mTOR and S6K1. *Science* **339**,  
965 1323-1328 (2013).
- 966 13 Robitaille, A. M. *et al.* Quantitative phosphoproteomics reveal mTORC1 activates  
967 de novo pyrimidine synthesis. *Science* **339**, 1320-1323 (2013).

- 968 14 Barretina, J. *et al.* The Cancer Cell Line Encyclopedia enables predictive modelling  
969 of anticancer drug sensitivity. *Nature* **483**, 603 (2012).
- 970 15 Ruiz-Ramos, A., Velázquez-Campoy, A., Grande-García, A., Moreno-Morcillo, M. &  
971 Ramón-Maiques, S. Structure and functional characterization of human aspartate  
972 transcarbamoylase, the target of the anti-tumoral drug PALA. *Structure* **24**, 1081-  
973 1094 (2016).
- 974 16 O'Connor, P. *et al.* Randomized trial of oral teriflunomide for relapsing multiple  
975 sclerosis. *New England Journal of Medicine* **365**, 1293-1303 (2011).
- 976 17 Williamson, C. T. *et al.* ATR inhibitors as a synthetic lethal therapy for tumours  
977 deficient in ARID1A. *Nature Communications* **7** (2016).
- 978 18 Chou, T.-C. Drug combination studies and their synergy quantification using the  
979 Chou-Talalay method. *Cancer research* **70**, 440-446 (2010).
- 980 19 Wild, J., Loughrey-Chen, S. & Corder, T. In the presence of CTP, UTP becomes an  
981 allosteric inhibitor of aspartate transcarbamoylase. *Proceedings of the National*  
982 *Academy of Sciences* **86**, 46-50 (1989).
- 983 20 Rabinowitz, J. D. *et al.* Dissecting enzyme regulation by multiple allosteric effectors:  
984 nucleotide regulation of aspartate transcarbamoylase. *Biochemistry* **47**, 5881-5888  
985 (2008).
- 986 21 Rees, S. *et al.* Bicistronic vector for the creation of stable mammalian cell lines that  
987 predisposes all antibiotic-resistant cells to express recombinant protein.  
988 *Biotechniques* **20**, 102-104, 106, 108-110 (1996).
- 989 22 Han, Y. *et al.* Proteomic investigation of the interactome of FMNL1 in hematopoietic  
990 cells unveils a role in calcium-dependent membrane plasticity. *Journal of*  
991 *proteomics* **78**, 72-82 (2013).
- 992 23 Yang, C.-P. H. & Horwitz, S. B. Taxol mediates serine phosphorylation of the 66-  
993 kDa Shc isoform. *Cancer Research* **60**, 5171-5178 (2000).
- 994 24 Keller, D. M., Zeng, S. X. & Lu, H. in *p53 Protocols*. 121-133 (Springer, Totowa,  
995 NJ, 2003).
- 996 25 Ran, F. A. *et al.* Genome engineering using the CRISPR-Cas9 system. *Nature*  
997 *protocols* **8**, 2281 (2013).

- 998 26 Huang, G. S. *et al.* Insulin-like growth factor 2 expression modulates Taxol  
999 resistance and is a candidate biomarker for reduced disease-free survival in ovarian  
1000 cancer. *Clinical Cancer Research* **16**, 2999-3010 (2010).
- 1001 27 Reagan-Shaw, S., Nihal, M. & Ahmad, N. Dose translation from animal to human  
1002 studies revisited. *The FASEB Journal* **22**, 659-661 (2008).
- 1003
